# Supplementary material
Source: PubMed Central journal article supplement (PMC11403354)
Supplement: NIHMS2015612-supplement-Supplement_File.pdf [file NIHMS2015612-supplement-Supplement_File.pdf]

| Major Tissue Type    | Num. Slides |
|----------------------|-------------|
| Heart                | 10427       |
| Lung                 | 9846        |
| Kidney               | 8388        |
| Bowel / Lower GI     | 8303        |
| Soft Tissue          | 7863        |
| Brain                | 7412        |
| Esophagogastric      | 6705        |
| Endocrine            | 6138        |
| Female Genital Tract | 5796        |
| Lymphatic System     | 4957        |
| Liver Biliary Tract  | 4677        |
| Male Genital Tract   | 4017        |
| Skin                 | 3653        |
| Breast               | 3364        |
| Bone                 | 2667        |
| Pancreas             | 2328        |
| Head & Neck          | 1555        |
| Peritoneum           | 1210        |
| Bladder              | 1059        |
| Eye                  | 61          |
| Total                | 100426      |

Supplementary Data Table 1: **Major Tissue Type Distribution of Mass-100K.** Mass-100K is a pretraining dataset that consists of 100,130,900 tissue patches from 100,426 diagnostic whole-slide images (WSIs) across 20 major tissue types collected from the Massachusetts General Hospital (MGH), Brigham & Women’s Hospital (BWH) and the Genotype-Tissue Expression (GTEx) consortium.

| Major Tissue Type    | Num. Slides |
|----------------------|-------------|
| Heart                | 4           |
| Lung                 | 3044        |
| Kidney               | 435         |
| Bowel / Lower GI     | 2002        |
| Soft Tissue          | 1275        |
| Brain                | 1607        |
| Esophagogastric      | 882         |
| Endocrine            | 549         |
| Female Genital Tract | 1834        |
| Lymphatic System     | 1342        |
| Liver Biliary Tract  | 1403        |
| Male Genital Tract   | 587         |
| Skin                 | 627         |
| Breast               | 1366        |
| Bone                 | 301         |
| Pancreas             | 543         |
| Head & Neck          | 532         |
| Peritoneum           | 389         |
| Bladder              | 568         |
| Eye                  | 21          |
| Total                | 21444       |

Supplementary Data Table 2: **Major Tissue Type Distribution of Mass-22K.** Mass-22K is a subset of Mass-100K, which contains 16,059,454 histology image patches sampled from 21,444 WSIs across 20 major tissue types with cancerous tissue collected from Massachusetts General Hospital (MGH) and Brigham & Women’s Hospital (BWH).

| Major Tissue Type    | Num. Slides |
|----------------------|-------------|
| Heart                | 3           |
| Lung                 | 136         |
| Kidney               | 43          |
| Bowel / Lower GI     | 55          |
| Soft Tissue          | 176         |
| Brain                | 219         |
| Esophagogastric      | 32          |
| Endocrine            | 34          |
| Female Genital Tract | 187         |
| Lymphatic System     | 134         |
| Liver Biliary Tract  | 75          |
| Male Genital Tract   | 33          |
| Skin                 | 43          |
| Breast               | 42          |
| Bone                 | 32          |
| Pancreas             | 28          |
| Head & Neck          | 61          |
| Peritoneum           | 34          |
| Bladder              | 30          |
| Eye                  | 7           |
| Total                | 1404        |

Supplementary Data Table 3: **Major Tissue Type Distribution of Mass-1K.** Mass-1K is a subset of Mass-22K, which contains 1,064,615 histology image patches sampled from 1,404 WSIs across 20 major tissue types with cancerous tissue collected from Massachusetts General Hospital (MGH) and Brigham & Women’s Hospital (BWH).

| Cancer Type                | OncoTree Code | Num. Slides |
|----------------------------|---------------|-------------|
| Adrenocortical Carcinoma   | ACC           | 51 (31:20)  |
| Ampullary Cancer           | AMPCA         | 42 (16:26)  |
| Anal Cancer                | ANSC          | 65 (51:14)  |
| Appendiceal Cancer         | MAAP          | 40 (23:17)  |
| Bladder Cancer             | BLAD          | 28 (8:20)   |
|                            | BLCA          | 65 (20:45)  |
|                            | UTUC          | 65 (22:43)  |
| Bone Cancer                | CHS           | 32 (10:22)  |
|                            | ES            | 48 (17:31)  |
|                            | OS            | 54 (26:28)  |
| Breast Cancer              | IDC           | 65 (56:9)   |
|                            | ILC           | 65 (65:0)   |
|                            | MDLC          | 65 (62:3)   |
| CNS Cancer                 | ATM           | 20 (7:13)   |
|                            | MNG           | 65 (47:18)  |
| Cervical Cancer            | CESC          | 60 (60:0)   |
|                            | ECAD          | 42 (42:0)   |
| Colorectal Cancer          | COAD          | 65 (35:30)  |
|                            | MACR          | 35 (14:21)  |
|                            | READ          | 65 (31:34)  |
| Embryonal Tumor            | MBL           | 62 (23:39)  |
| Endometrial Cancer         | UCCC          | 23 (23:0)   |
|                            | UCS           | 65 (65:0)   |
|                            | UEC           | 65 (65:0)   |
|                            | UMEC          | 25 (25:0)   |
|                            | USC           | 65 (65:0)   |
| Esophagogastric Cancer     | ESCA          | 64 (19:45)  |
|                            | ESCC          | 65 (31:34)  |
|                            | GEJ           | 65 (17:48)  |
|                            | SSRCC         | 28 (15:13)  |
|                            | STAD          | 65 (31:34)  |
| Gastroint. Neuroend. Tumor | GINET         | 65 (33:32)  |
| Gastroint. Stromal Tumor   | GIST          | 65 (33:32)  |
| Germ Cell Tumor            | MGCT          | 36 (0:36)   |
|                            | SEM           | 63 (0:63)   |

| Cancer Type (Cont.)         | OncoTree Code | Num. Slides |
|-----------------------------|---------------|-------------|
| Glioma                      | AASTR         | 54 (20:34)  |
|                             | AODG          | 31 (17:14)  |
|                             | ASTR          | 65 (30:35)  |
|                             | EPM           | 38 (13:25)  |
|                             | GBM           | 65 (33:32)  |
|                             | HGGNOS        | 65 (26:39)  |
|                             | LGGNOS        | 63 (24:39)  |
|                             | ODG           | 58 (28:30)  |
| PAST                        | 35 (18:17)    |             |
| Head and Neck Cancer        | HNSC          | 65 (19:46)  |
| Hepatobiliary Cancer        | CHOL          | 65 (26:39)  |
|                             | GBC           | 65 (47:18)  |
|                             | HCC           | 65 (25:40)  |
| Mature B-Cell Neoplasms     | CLLSLL        | 26 (13:13)  |
|                             | DLBCLNOS      | 65 (23:42)  |
|                             | FL            | 54 (28:26)  |
| Mature T and NK Neoplasms   | MYCF          | 37 (15:22)  |
| Melanoma                    | MEL           | 65 (28:37)  |
| Mesothelioma                | PLBMESO       | 63 (6:57)   |
|                             | PLEMESO       | 65 (20:45)  |
| Misc. Neuroepithelial Tumor | PGNG          | 24 (13:11)  |
| Nerve Sheath Tumor          | MPNST         | 40 (17:23)  |
|                             | SCHW          | 38 (23:15)  |
| Non-Small Cell Lung Cancer  | ALUCA         | 30 (20:10)  |
|                             | LUAD          | 64 (37:27)  |
|                             | LUAS          | 32 (19:13)  |
|                             | LUCA          | 64 (52:12)  |
|                             | LUNE          | 33 (20:13)  |
|                             | LUSC          | 65 (30:35)  |
|                             | NSCLCPD       | 65 (30:35)  |
| Ovarian Cancer              | CCOV          | 65 (65:0)   |
|                             | EOV           | 65 (65:0)   |
|                             | HGSOC         | 65 (65:0)   |
|                             | LGSOC         | 62 (62:0)   |
|                             | MOV           | 33 (33:0)   |
|                             | MXOV          | 49 (49:0)   |
|                             | OCS           | 42 (42:0)   |
| SBOV                        | 28 (28:0)     |             |
| Pancreatic Cancer           | PAAD          | 64 (26:38)  |
|                             | PANET         | 65 (31:34)  |
| Peripheral Nervous System   | NBL           | 65 (27:38)  |
| Prostate Cancer             | PRAD          | 65 (0:65)   |

| Cancer Type (Cont.)       | OncoTree Code | Num. Slides |
|---------------------------|---------------|-------------|
| Renal Cell Carcinoma      | CCRCC         | 65 (26:39)  |
|                           | CHRCC         | 65 (28:37)  |
|                           | PRCC          | 65 (22:43)  |
|                           | ROCY          | 20 (6:14)   |
| Salivary Gland Cancer     | ACYC          | 33 (21:12)  |
| Sellar Tumor              | PTAD          | 65 (41:24)  |
| Sex Cord Stromal Tumor    | GRCT          | 33 (33:0)   |
| Skin Cancer, Non-Melanoma | CSCC          | 65 (15:50)  |
|                           | MCC           | 65 (23:42)  |
| Small Bowel Cancer        | SBC           | 53 (18:35)  |
| Small Cell Lung Cancer    | SCLC          | 65 (36:29)  |
| Soft Tissue Sarcoma       | ANGS          | 50 (28:22)  |
|                           | DDLS          | 65 (28:37)  |
|                           | DES           | 41 (27:14)  |
|                           | ERMS          | 20 (9:11)   |
|                           | HEMA          | 65 (31:34)  |
|                           | LMS           | 65 (50:15)  |
|                           | MFH           | 60 (24:36)  |
|                           | MFS           | 30 (15:15)  |
|                           | PECOMA        | 21 (18:3)   |
|                           | SFT           | 45 (21:24)  |
|                           | SYNS          | 43 (18:25)  |
| WDLS                      | 23 (12:11)    |             |
| Thymic Tumor              | THYM          | 24 (14:10)  |
| Thyroid Cancer            | THAP          | 30 (19:11)  |
|                           | THFO          | 28 (15:13)  |
|                           | THME          | 34 (15:19)  |
|                           | THPA          | 65 (39:26)  |
| Uterine Sarcoma           | ULMS          | 51 (51:0)   |
| Vaginal Cancer            | VSC           | 47 (47:0)   |
| Wilms Tumor               | WT            | 63 (29:34)  |

Supplementary Data Table 4: **Hierarchical label distribution of the coarse and fine-grained tasks in OncoTree (OT) code cancer classification.** The OT-43 and OT-108 tasks are developed from a dataset comprising 5,564 WSIs from 43 cancer types collected from in-house BWH slides, which are further subdivided into 108 OncoTree codes, with at least 20 WSIs per OncoTree code. The OT-43 task is developed using the first level of the hierarchy (“Cancer Type” column), and the OT-108 task is developed using the second level of the hierarchy (“OncoTree Code” column), with both tasks using the same train-test folds. Gender ratio (female:male) is reported for each OncoTree code. Except for BLCA, IDC, ILC, COAD, READ, UEC, STAD, HNSC, DLBCLNOS, MEL, LUAD, LUSC, PAAD, PRAD, CSCC, SCLC, GEJ, and CLLSLL, cancer types in this task are rare cancers designated by RARECARE and NCI-SEER.

| Hyper-parameter                       | Value        |
|---------------------------------------|--------------|
| Layers                                | 24           |
| Heads                                 | 16           |
| Patch size                            | 16           |
| FFN layer                             | MLP          |
| Head activation                       | GELU         |
| Embedding dimension                   | 1024         |
| Stochastic dropout rate               | 0.1          |
| Global crop scale                     | 0.48, 1.0    |
| Global crop number & size             | 2, 224       |
| Local crop scale                      | 0.16, 0.48   |
| Local crop number & size              | 8, 96        |
| Max masking ratio                     | 0.5          |
| Min masking ratio                     | 0.1          |
| Gradient clipping max norm            | 3.0          |
| Normalize last layer                  | ✓            |
| Shared head                           | ✗            |
| AdamW $\beta$                         | (0.9, 0.999) |
| Batch size                            | 3072         |
| Freeze last layer iterations          | 1250         |
| Warmup iterations                     | 12500        |
| Warmup teacher temperature iterations | 37500        |
| High-resolution finetuning iterations | 12500        |
| Max Iterations                        | 125000       |
| Learning rate schedule                | Cosine       |
| Learning rate (start)                 | 0            |
| Learning rate (post warmup)           | 2e-3         |
| Learning rate (final)                 | 1e-6         |
| Teacher temperature (start)           | 0.04         |
| Teacher temperature (final)           | 0.4          |
| Teacher momentum (start)              | 0.992        |
| Teacher momentum (final)              | 1.000        |
| Weight decay (start)                  | 0.04         |
| Weight decay (end)                    | 0.4          |
| Automatic mixed precision             | FP16         |

Supplementary Data Table 5: **DINOv2 hyperparameters used for ViT-L/16 pretraining.**  $4 \times 80\text{GB}$  NVIDIA A100 GPUs were used for training. Batch size refers to the total batch size across GPUs.

| Hyperparameter                    | Value        |
|-----------------------------------|--------------|
| Layers                            | 12           |
| Heads                             | 12           |
| Patch size                        | 16           |
| Head activation                   | GELU         |
| Embedding dimension               | 768          |
| Drop path rate                    | 0.1          |
| Global crop scale                 | 0.32, 1.0    |
| Global crop number                | 2            |
| Local crop scale                  | 0.05, 0.32   |
| Local crop number                 | 10           |
| Partial prediction shape          | Block        |
| Partial prediction ratio          | 0.3          |
| Partial prediction variance       | 0.2          |
| Gradient clipping max norm        | 0.3          |
| Normalize last layer              | ✓            |
| Shared head                       | ✓            |
| AdamW $\beta$                     | (0.9, 0.999) |
| Batch size                        | 1024         |
| Freeze last layer epochs          | 3            |
| Warmup epochs                     | 10           |
| Warmup teacher temperature epochs | 30           |
| Max epochs                        | 80           |
| Learning rate schedule            | Cosine       |
| Learning rate (start)             | 0            |
| Learning rate (post warmup)       | 2e-3         |
| Learning rate (final)             | 2e-6         |
| Teacher temperature (start)       | 0.04         |
| Teacher temperature (final)       | 0.4          |
| Teacher momentum (start)          | 0.996        |
| Teacher momentum (final)          | 1.000        |
| Weight decay (start)              | 0.04         |
| Weight decay (end)                | 0.4          |
| Automatic mixed precision         | fp16         |

Supplementary Data Table 6: **iBOT hyperparameters used for ViT-B/16 pretraining**.  $4 \times 80\text{GB}$  NVIDIA A100 GPUs were used for training. Batch size refers to the total batch size across GPUs.

| Hyper-parameter               | Value        |
|-------------------------------|--------------|
| Layers                        | 24           |
| Heads                         | 16           |
| Patch size                    | 16           |
| FFN layer                     | MLP          |
| Head activation               | GELU         |
| Embedding dimension           | 1024         |
| Stochastic dropout rate       | 0.1          |
| Feature Dim                   | 256          |
| MLP Dim                       | 4096         |
| Momentum of updating encoder  | 0.99         |
| Momentum with cosine schedule | ✓            |
| Softmax temperature           | 0.2          |
| Stop gradients conv1          | ✓            |
| Min crop scale                | 0.08         |
| AdamW $\beta$                 | (0.9, 0.999) |
| Batch size                    | 2048         |
| Warmup iterations             | 20480        |
| Total iterations              | 156000       |
| Weight decay                  | 0.1          |
| Automatic mixed precision     | FP16         |

Supplementary Data Table 7: **MoCoV3 hyperparameters used in ViT-L/16 pretraining.**  $4 \times 80\text{GB}$  NVIDIA A100 GPUs were used for training. Batch size refers to the total batch size across GPUs.

| Hyper-parameter               | Value        |
|-------------------------------|--------------|
| Architecture                  | ResNet-50    |
| Embedding dimension           | 2048         |
| Feature Dim                   | 256          |
| MLP Dim                       | 4096         |
| Momentum of updating encoder  | 0.99         |
| Momentum with cosine schedule | ✓            |
| Softmax temperature           | 1.0          |
| Min crop scale                | 0.2          |
| AdamW $\beta$                 | (0.9, 0.999) |
| Batch size                    | 2048         |
| Warmup iterations             | 5120         |
| Total iterations              | 156000       |
| Weight decay                  | 1e-6         |
| Automatic mixed precision     | FP16         |

Supplementary Data Table 8: **MoCoV3 hyperparameters used in ResNet-50 pretraining.**  $4 \times 80\text{GB}$  NVIDIA A100 GPUs were used for training. Batch size refers to the total batch size across GPUs.

| Hyperparameter         | Value        |
|------------------------|--------------|
| Batch size             | 1            |
| Weight decay           | 1e-5         |
| AdamW $\beta$          | (0.9, 0.999) |
| Peak learning rate     | 1e-4         |
| Learning rate schedule | Cosine       |
| Epochs                 | 20           |

Supplementary Data Table 9: **Hyperparameters used in slide-level supervised classification.** Single 24GB NVIDIA GeForce RTX 3090 GPUs were used for each ABMIL model using weakly-supervised learning and slide-level labels.



| Encoder                 | Arch.        | # Params | Inference Speed   |
|-------------------------|--------------|----------|-------------------|
| ResNet-50 <sub>IN</sub> | ResNet-50    | 23M      | 1333.8 images/sec |
| CTransPath              | Swin-T/14    | 28M      | 729.6 images/sec  |
| REMEDIS                 | ResNet-152×2 | 232M     | 212.5 images/sec  |
| UNI                     | ViT-L/16     | 307M     | 133.1 images/sec  |

Supplementary Data Table 10: **Architecture details of pretrained vision encoders.** We report architecture details of each encoder. Using 1 NVIDIA GeForce 24GB 3090 TI, inference speed was computed by extracting features from batches of  $256 \times 256$  RGB images (batch size of 256, 32-bit floating point precision, 16 threads) using the PyTorch `ImageFolder` API (followed by `torchvision.transforms` that performed center-cropping to  $256 \times 256$  resolution).

| Encoder    | SSL Recipe | Pretrain Source       | # Patches | # Slides | Epochs | Images Seen | Batch Size | Time | Resources            |
|------------|------------|-----------------------|-----------|----------|--------|-------------|------------|------|----------------------|
| CTransPath | MoCoV3     | TCGA, PAIP            | 15.6M     | 29.8K    | 100    | 15.6B       | 1024       | 250H | 48 V100s             |
| REMEDIS    | TCGA       | BIT+SimCLR            | 50.0M     | 29.0K    | 1000   | 50.0B       | 4096       | 150H | 256 TPU <sub>s</sub> |
| UNI        | DINOv2     | MGB, GTE <sub>x</sub> | 100.1M    | 100.1K   | 3.85   | 384M        | 3072       | 32H  | 32 A100s             |

Supplementary Data Table 11: **Comparison of implementation details of pretrained vision encoders.** We show differences in self-supervised learning recipe by each pretrained encoder, such as pretraining data source (number of patches and slides) and resources spent (approximate number of epochs and hours spent during training) by the original study. Note that while UNI trained in less time, it was developed with more updated computing environments (GPU resources, CUDA version, software implementation).

| Encoder                 | Full? | Top-1 ACC                  | Top-3 ACC                   | Top-5 ACC                  | Weighted F1                | AUROC                      |
|-------------------------|-------|----------------------------|-----------------------------|----------------------------|----------------------------|----------------------------|
| ResNet-50 <sub>IN</sub> | ✓     | 0.336 (0.312-0.359)        | 0.557 (0.531-0.581)         | 0.674 (0.651-0.697)        | 0.274 (0.251-0.297)        | 0.869 (0.858-0.879)        |
| CTransPath              | ✓     | 0.578 (0.554-0.602)        | 0.796 (0.777-0.815)         | 0.876 (0.859-0.891)        | 0.562 (0.536-0.586)        | 0.957 (0.950-0.963)        |
| REMEDIS                 | ✓     | 0.040 (0.030-0.049)        | 0.157 (0.138-0.175)         | 0.204 (0.185-0.224)        | 0.012 (0.007-0.019)        | 0.727 (0.716-0.736)        |
| UNI                     | ✓     | <b>0.720 (0.698-0.741)</b> | <b>0.8907 (0.874-0.906)</b> | <b>0.935 (0.924-0.947)</b> | <b>0.719 (0.695-0.741)</b> | <b>0.976 (0.972-0.981)</b> |
| ResNet-50 <sub>IN</sub> | ✗     | 0.327 (0.304-0.349)        | 0.552 (0.527-0.576)         | 0.657 (0.633-0.680)        | 0.258 (0.236-0.280)        | 0.862 (0.850-0.873)        |
| CTransPath              | ✗     | 0.569 (0.546-0.592)        | 0.793 (0.773-0.812)         | 0.874 (0.858-0.890)        | 0.555 (0.530-0.578)        | 0.956 (0.949-0.962)        |
| REMEDIS                 | ✗     | 0.593 (0.570-0.617)        | 0.802 (0.783-0.822)         | 0.875 (0.859-0.890)        | 0.592 (0.567-0.615)        | 0.954 (0.946-0.961)        |
| UNI                     | ✗     | <b>0.731 (0.709-0.752)</b> | <b>0.894 (0.879-0.910)</b>  | <b>0.938 (0.926-0.949)</b> | <b>0.729 (0.706-0.750)</b> | <b>0.976 (0.971-0.981)</b> |

Supplementary Data Table 12: **Weakly-supervised 43-class cancer type classification (OT-43) based on in-house BWH data (43 classes)**. Pre-extracted patch features of each encoder with ABMIL were trained and evaluated on curated train-test folds (3,944:1,620), with test performance ( $n = 1620$  slides) reported using top-1, top-3, and top-5 accuracy, weighted F1 score, and AUROC. We report results for both extracted features using all tissue patches per WSI, as well as extracted features from 200 representative tissue patches per WSI (described in **Online Methods**). Best performing model for each metric is bolded. 95% CI is included in parentheses.

| Data      | Arch. | Top-1 ACC                  | Top-3 ACC                  | Top-5 ACC                  | Weighted F1                | ROCAUC                     |
|-----------|-------|----------------------------|----------------------------|----------------------------|----------------------------|----------------------------|
| Mass-1K   | ViT-B | 0.650 (0.638-0.638)        | 0.834 (0.828-0.828)        | 0.892 (0.897-0.897)        | 0.649 (0.634-0.634)        | 0.964 (0.966-0.966)        |
| Mass-1K   | ViT-L | 0.652 (0.628-0.676)        | 0.835 (0.816-0.852)        | 0.895 (0.880-0.910)        | 0.653 (0.627-0.676)        | 0.962 (0.955-0.968)        |
| Mass-22K  | ViT-B | 0.714 (0.717-0.717)        | 0.886 (0.886-0.886)        | 0.938 (0.940-0.940)        | 0.711 (0.713-0.713)        | 0.976 (0.978-0.978)        |
| Mass-22K  | ViT-L | 0.694 (0.673-0.716)        | 0.891 (0.875-0.905)        | 0.931 (0.918-0.943)        | 0.692 (0.670-0.714)        | 0.969 (0.963-0.975)        |
| Mass-100K | ViT-B | 0.685 (0.700-0.700)        | 0.865 (0.865-0.865)        | 0.928 (0.932-0.932)        | 0.682 (0.695-0.695)        | 0.973 (0.975-0.975)        |
| Mass-100K | ViT-L | <b>0.731 (0.709-0.752)</b> | <b>0.894 (0.879-0.910)</b> | <b>0.938 (0.926-0.949)</b> | <b>0.729 (0.706-0.750)</b> | <b>0.976 (0.972-0.981)</b> |

Supplementary Data Table 13: **Assessing model scale of UNI (pretrained on Mass-1K, Mass-22K, and Mass-100K) on OT-43 performance**. Comparisons of weakly-supervised performance on OT-43 of UNI pretrained on different data sizes (Mass-1K, Mass-22K, Mass-100K), across different model architectures (arch.), ViT-B/16 using iBOT and ViT-L/16 using DINOv2. Pre-extracted patch features of each encoder with ABMIL were trained and evaluated on curated train-test folds (3,944:1,620), with test performance ( $n = 1620$  slides) reported using top-1, top-3, and top-5 accuracy, weighted F1 score, and AUROC. Best performing model for each metric is bolded. 95% CI is included in parentheses.

| Data      | Iter. | Top-1 ACC                  | Top-3 ACC                  | Top-5 ACC                  | Weighted F1                | AUROC                      |
|-----------|-------|----------------------------|----------------------------|----------------------------|----------------------------|----------------------------|
| Mass-1K   | 50K   | 0.640 (0.616-0.662)        | 0.843 (0.825-0.860)        | 0.908 (0.894-0.922)        | 0.638 (0.612-0.659)        | 0.968 (0.962-0.973)        |
| Mass-1K   | 75K   | 0.646 (0.622-0.669)        | 0.838 (0.820-0.856)        | 0.898 (0.883-0.912)        | 0.644 (0.619-0.667)        | 0.965 (0.959-0.971)        |
| Mass-1K   | 100K  | 0.649 (0.625-0.672)        | 0.847 (0.829-0.863)        | 0.905 (0.890-0.919)        | 0.649 (0.624-0.671)        | 0.964 (0.957-0.970)        |
| Mass-1K   | 125K  | 0.652 (0.628-0.676)        | 0.835 (0.816-0.852)        | 0.895 (0.880-0.910)        | 0.653 (0.627-0.676)        | 0.962 (0.955-0.968)        |
| Mass-22K  | 50K   | 0.707 (0.685-0.730)        | 0.887 (0.870-0.902)        | 0.930 (0.918-0.943)        | 0.704 (0.680-0.728)        | 0.974 (0.968-0.979)        |
| Mass-22K  | 75K   | 0.708 (0.684-0.730)        | 0.881 (0.865-0.896)        | 0.930 (0.917-0.941)        | 0.707 (0.682-0.728)        | 0.972 (0.967-0.977)        |
| Mass-22K  | 100K  | 0.708 (0.686-0.730)        | 0.888 (0.873-0.904)        | 0.938 (0.925-0.949)        | 0.705 (0.682-0.726)        | 0.973 (0.967-0.978)        |
| Mass-22K  | 125K  | 0.694 (0.673-0.716)        | 0.891 (0.875-0.905)        | 0.931 (0.918-0.943)        | 0.692 (0.670-0.714)        | 0.969 (0.963-0.975)        |
| Mass-100K | 50K   | 0.694 (0.672-0.716)        | 0.871 (0.855-0.888)        | 0.927 (0.913-0.939)        | 0.694 (0.669-0.715)        | 0.974 (0.968-0.978)        |
| Mass-100K | 75K   | 0.704 (0.682-0.725)        | 0.889 (0.873-0.904)        | 0.935 (0.923-0.948)        | 0.703 (0.679-0.724)        | 0.977 (0.972-0.981)        |
| Mass-100K | 100K  | 0.720 (0.699-0.742)        | 0.886 (0.871-0.901)        | 0.931 (0.919-0.943)        | 0.719 (0.697-0.741)        | <b>0.977 (0.972-0.981)</b> |
| Mass-100K | 125K  | <b>0.731 (0.709-0.752)</b> | <b>0.894 (0.879-0.910)</b> | <b>0.938 (0.926-0.949)</b> | <b>0.729 (0.706-0.750)</b> | <b>0.976 (0.972-0.981)</b> |

Supplementary Data Table 14: **Assessing pretraining length of UNI (pretrained on Mass-1K, Mass-22K, and Mass-100K) on OT-43 performance**. Comparisons of weakly-supervised performance on OT-43 of UNI pretrained on different data sizes (Mass-1K, Mass-22K, Mass-100K), across different training iterations ranging from 50K to 125K. Pre-extracted patch features of each encoder with ABMIL were trained and evaluated on curated train-test folds (3,944:1,620), with test performance ( $n = 1620$  slides) reported using top-1, top-3, and top-5 accuracy, weighted F1 score, and AUROC. Best performing model for each metric is bolded. 95% CI is included in parentheses.

| Encoder                 | Full? | Top-1 ACC                  | Top-3 ACC                  | Top-5 ACC                  | Weighted F1                | AUROC                      |
|-------------------------|-------|----------------------------|----------------------------|----------------------------|----------------------------|----------------------------|
| ResNet-50 <sub>IN</sub> | ✓     | 0.156 (0.138-0.173)        | 0.309 (0.287-0.333)        | 0.391 (0.368-0.416)        | 0.115 (0.101-0.132)        | 0.874 (0.866-0.882)        |
| CTransPath              | ✓     | 0.391 (0.366-0.415)        | 0.620 (0.597-0.645)        | 0.715 (0.694-0.736)        | 0.358 (0.333-0.383)        | 0.958 (0.954-0.963)        |
| REMEDIS                 | ✓     | 0.118 (0.102-0.133)        | 0.225 (0.205-0.244)        | 0.293 (0.270-0.314)        | 0.074 (0.060-0.087)        | 0.857 (0.849-0.867)        |
| UNI                     | ✓     | <b>0.525 (0.501-0.549)</b> | <b>0.751 (0.728-0.772)</b> | <b>0.829 (0.812-0.847)</b> | <b>0.509 (0.483-0.534)</b> | <b>0.971 (0.967-0.975)</b> |
| ResNet-50 <sub>IN</sub> | ✗     | 0.148 (0.130-0.164)        | 0.299 (0.277-0.322)        | 0.378 (0.354-0.403)        | 0.105 (0.091-0.121)        | 0.869 (0.860-0.877)        |
| CTransPath              | ✗     | 0.399 (0.375-0.423)        | 0.625 (0.602-0.649)        | 0.723 (0.702-0.746)        | 0.365 (0.342-0.389)        | 0.959 (0.955-0.963)        |
| REMEDIS                 | ✗     | 0.412 (0.387-0.435)        | 0.654 (0.630-0.678)        | 0.735 (0.713-0.757)        | 0.398 (0.372-0.421)        | 0.952 (0.946-0.956)        |
| UNI                     | ✗     | <b>0.538 (0.514-0.562)</b> | <b>0.759 (0.738-0.781)</b> | <b>0.843 (0.826-0.860)</b> | <b>0.522 (0.498-0.548)</b> | <b>0.972 (0.968-0.976)</b> |

Supplementary Data Table 15: **Weakly-supervised 108-class OncoTree code cancer classification (OT-108) based on in-house BWH data (108 classes)**. Pre-extracted patch features of each encoder with ABMIL were trained and evaluated on curated train-test folds (3,944:1,620), with test performance ( $n = 1620$  slides) reported using top-1, top-3, and top-5 accuracy, weighted F1 score, and AUROC. We report results for both extracted features using all tissue patches per WSI, as well as extracted features from 200 representative tissue patches per WSI (described in **Online Methods**). Best performing model for each metric is bolded. 95% CI is included in parentheses.

| Data      | Arch. | Top-1 ACC                  | Top-3 ACC                  | Top-5 ACC                  | Weighted F1                | ROCAUC                     |
|-----------|-------|----------------------------|----------------------------|----------------------------|----------------------------|----------------------------|
| Mass-1K   | ViT-B | 0.453 (0.456-0.456)        | 0.663 (0.667-0.667)        | 0.746 (0.743-0.743)        | 0.436 (0.442-0.442)        | 0.961 (0.961-0.961)        |
| Mass-1K   | ViT-L | 0.473 (0.449-0.499)        | 0.673 (0.652-0.698)        | 0.757 (0.738-0.780)        | 0.455 (0.430-0.482)        | 0.961 (0.956-0.965)        |
| Mass-22K  | ViT-B | 0.522 (0.514-0.514)        | 0.754 (0.747-0.747)        | 0.833 (0.831-0.831)        | 0.503 (0.495-0.495)        | <b>0.975 (0.976-0.976)</b> |
| Mass-22K  | ViT-L | 0.508 (0.485-0.531)        | 0.740 (0.719-0.761)        | 0.825 (0.807-0.842)        | 0.486 (0.461-0.510)        | 0.972 (0.968-0.975)        |
| Mass-100K | ViT-B | 0.503 (0.507-0.507)        | 0.729 (0.715-0.715)        | 0.807 (0.793-0.793)        | 0.483 (0.490-0.490)        | 0.973 (0.972-0.972)        |
| Mass-100K | ViT-L | <b>0.538 (0.514-0.562)</b> | <b>0.759 (0.738-0.781)</b> | <b>0.843 (0.826-0.860)</b> | <b>0.522 (0.498-0.548)</b> | 0.972 (0.968-0.976)        |

Supplementary Data Table 16: **Assessing model scale of UNI (pretrained on Mass-1K, Mass-22K, and Mass-100K) on OT-108 performance**. Comparisons of weakly-supervised performance on OT-108 of UNI pretrained on different data sizes (Mass-1K, Mass-22K, Mass-100K), across different model architectures (arch.), ViT-B/16 using iBOT and ViT-L/16 using DINOv2. Pre-extracted patch features of each encoder with ABMIL were trained and evaluated on curated train-test folds (3,944:1,620), with test performance ( $n = 1620$  slides) reported using top-1, top-3, and top-5 accuracy, weighted F1 score, and AUROC. Best performing model for each metric is bolded. 95% CI is included in parentheses.

| Data Size | Iter | Top-1 ACC                  | Top-3 ACC                  | Top-5 ACC                  | Weighted F1                | AUROC                      |
|-----------|------|----------------------------|----------------------------|----------------------------|----------------------------|----------------------------|
| Mass-1K   | 50K  | 0.459 (0.435-0.486)        | 0.679 (0.657-0.702)        | 0.767 (0.748-0.787)        | 0.436 (0.411-0.462)        | 0.968 (0.964-0.971)        |
| Mass-1K   | 75K  | 0.464 (0.440-0.488)        | 0.681 (0.660-0.706)        | 0.757 (0.736-0.778)        | 0.440 (0.416-0.466)        | 0.967 (0.963-0.971)        |
| Mass-1K   | 100K | 0.458 (0.434-0.482)        | 0.675 (0.654-0.699)        | 0.760 (0.740-0.781)        | 0.436 (0.412-0.461)        | 0.964 (0.960-0.968)        |
| Mass-1K   | 125K | 0.473 (0.449-0.499)        | 0.673 (0.652-0.698)        | 0.757 (0.738-0.780)        | 0.455 (0.430-0.482)        | 0.961 (0.956-0.965)        |
| Mass-22K  | 50K  | 0.511 (0.487-0.536)        | 0.752 (0.732-0.775)        | 0.830 (0.812-0.848)        | 0.493 (0.467-0.519)        | <b>0.976 (0.972-0.979)</b> |
| Mass-22K  | 75K  | 0.522 (0.498-0.549)        | 0.748 (0.727-0.770)        | 0.840 (0.821-0.857)        | 0.498 (0.474-0.524)        | 0.976 (0.972-0.979)        |
| Mass-22K  | 100K | 0.512 (0.489-0.538)        | 0.747 (0.726-0.770)        | 0.830 (0.811-0.848)        | 0.491 (0.465-0.517)        | 0.974 (0.971-0.977)        |
| Mass-22K  | 125K | 0.508 (0.485-0.531)        | 0.740 (0.719-0.761)        | 0.825 (0.807-0.842)        | 0.486 (0.461-0.510)        | 0.972 (0.968-0.975)        |
| Mass-100K | 50K  | 0.511 (0.486-0.536)        | 0.741 (0.720-0.764)        | 0.827 (0.809-0.846)        | 0.491 (0.465-0.516)        | 0.974 (0.971-0.977)        |
| Mass-100K | 75K  | 0.523 (0.499-0.548)        | 0.762 (0.741-0.782)        | 0.837 (0.820-0.854)        | 0.507 (0.481-0.533)        | 0.975 (0.972-0.979)        |
| Mass-100K | 100K | 0.533 (0.508-0.559)        | <b>0.768 (0.748-0.788)</b> | 0.841 (0.823-0.859)        | 0.516 (0.491-0.542)        | 0.975 (0.971-0.978)        |
| Mass-100K | 125K | <b>0.538 (0.514-0.562)</b> | 0.759 (0.738-0.781)        | <b>0.843 (0.826-0.860)</b> | <b>0.522 (0.498-0.548)</b> | 0.972 (0.968-0.976)        |

Supplementary Data Table 17: **Assessing pretraining length of UNI (pretrained on Mass-1K, Mass-22K, and Mass-100K) on OT-108 performance**. Comparisons of weakly-supervised performance on OT-108 of UNI pretrained on different data sizes (Mass-1K, Mass-22K, Mass-100K), across different training iterations ranging from 50K to 125K. Pre-extracted patch features of each encoder with ABMIL were trained and evaluated on curated train-test folds (3,944:1,620), with test performance ( $n = 1620$  slides) reported using top-1, top-3, and top-5 accuracy, weighted F1 score, and AUROC. Best performing model for each metric is bolded. 95% CI is included in parentheses.

| SSL Method | Arch.     | OT-43                      |                            | OT-108                     |                            |
|------------|-----------|----------------------------|----------------------------|----------------------------|----------------------------|
|            |           | Top-1 ACC                  | AUROC                      | Top-1 ACC                  | AUROC                      |
| MoCoV3     | ResNet-50 | 0.600 (0.575-0.623)        | 0.950 (0.942-0.958)        | 0.399 (0.376-0.423)        | 0.957 (0.952-0.962)        |
| MoCoV3     | ViT-L     | 0.499 (0.503-0.503)        | 0.934 (0.931-0.931)        | 0.273 (0.283-0.283)        | 0.940 (0.937-0.937)        |
| DINOv2     | ViT-L     | <b>0.652 (0.628-0.676)</b> | <b>0.962 (0.955-0.968)</b> | <b>0.473 (0.449-0.499)</b> | <b>0.961 (0.956-0.965)</b> |

Supplementary Data Table 18: **Assessing impact of SSL pretraining algorithm on OT-43 and OT-108 performance.** Comparing weakly-supervised performance of MoCoV3 and DINOv2 on OT-43 and OT-108 with Mass-1K pretraining. For MoCoV3, we used both the ResNet-50 and ViT-L architecture. Pre-extracted patch features of each encoder with ABMIL were trained and evaluated on curated train-test folds (3,944:1,620), with test performance ( $n = 1620$  slides) reported using top-1 and AUROC. Best performing model for each metric is bolded. 95% CI is included in parentheses.

| Cancer Subtype | Cancer Diagnosis            | Num. Slides |
|----------------|-----------------------------|-------------|
| Benign         | Normal                      | 44          |
|                | Pathological Benign         | 147         |
|                | Usual Ductal Hyperplasia    | 74          |
| Atypical       | Atypical Ductal Hyperplasia | 48          |
|                | Flat Epithelial Atypia      | 41          |
| Malignant      | Ductal Carcinoma in Situ    | 61          |
|                | Invasive Carcinoma          | 132         |

Supplementary Data Table 19: **Hierarchical label distribution of BRCA Coarse- and Fine-Grained Subtyping based on BRACS.** The coarse-grained BRCA subtyping task is developed using the first level of the hierarchy (“Cancer Subtype” column), and the fine-grained BRCA subtyping task is developed using the second level of the hierarchy (“Cancer Diagnosis” column), with both tasks using the official train-validation-test folds of the BRACS dataset.

| Cancer Subtype                                            | Cancer Diagnosis                                                     | Num. Slides |
|-----------------------------------------------------------|----------------------------------------------------------------------|-------------|
| Adult-type diffuse gliomas                                | Anaplastic astrocytoma, <i>IDH1</i> -mutant                          | 47          |
|                                                           | Anaplastic astrocytoma, <i>IDH1</i> -wildtype                        | 47          |
|                                                           | Anaplastic oligodendroglioma, <i>IDH1</i> -mutant & 1p/19q codeleted | 91          |
|                                                           | Glioblastoma, <i>IDH1</i> -mutant                                    | 34          |
|                                                           | Glioblastoma, <i>IDH1</i> -wildtype                                  | 474         |
|                                                           | Gliosarcoma                                                          | 59          |
|                                                           | Oligodendroglioma, <i>IDH1</i> -mutant & 1p/19q codeleted            | 85          |
| Circumscribed astrocytic gliomas                          | Pilocytic astrocytoma                                                | 173         |
| Cranial and paraspinal nerve tumours                      | Schwannoma                                                           | 81          |
| Embryonal Tumors                                          | Medulloblastoma, non-WNT/non-SHH                                     | 32          |
| Ependymal Tumours                                         | Anaplastic ependymoma                                                | 50          |
|                                                           | Ependymoma                                                           | 46          |
| Glioneuronal and neuronal tumours                         | Ganglioglioma                                                        | 88          |
| Haematolymphoid tumours involving the CNS                 | Diffuse large B-cell lymphoma of the CNS                             | 59          |
|                                                           | Langerhans cell histiocytosis                                        | 32          |
| Meningiomas                                               | Anaplastic meningioma                                                | 46          |
|                                                           | Angiomatous meningioma                                               | 31          |
|                                                           | Atypical meningioma                                                  | 83          |
|                                                           | Fibrous meningioma                                                   | 57          |
|                                                           | Meningothelial meningioma                                            | 104         |
|                                                           | Secretory meningioma                                                 | 41          |
|                                                           | Transitional meningioma                                              | 68          |
| Mesenchymal, non-meningothelial tumours involving the CNS | Haemangioblastoma                                                    | 88          |
|                                                           | Haemangioma                                                          | 30          |
|                                                           | Haemangiopericytoma                                                  | 34          |
|                                                           | Lipoma                                                               | 38          |
| Metastatic tumours                                        | Metastatic tumours                                                   | 47          |
| Paediatric-type diffuse low-grade gliomas                 | Diffuse astrocytoma, <i>IDH1</i> -mutant                             | 70          |
| Tumours of the sellar region                              | Adamantinomatous craniopharyngioma                                   | 85          |
|                                                           | Pituitary adenoma                                                    | 99          |

Supplementary Data Table 20: **Hierarchical label distribution of brain tumor coarse- and fine-grained subtyping based on EBRAINS.** The coarse-grained brain tumor subtyping task is developed using the first level of the hierarchy (“Cancer Subtype” column), and the fine-grained brain tumor subtyping task is developed using the second level of the hierarchy (“Cancer Diagnosis” column), with both tasks using same train-validation-test folds created using the EBRAINS Digital Tumor Atlas. All brain tumors in these tasks are designated as rare cancers by RARECARE and NCI-SEER.

| <i>IDH1</i> status    | Histomolecular Subtype                                    | Num. Slides |
|-----------------------|-----------------------------------------------------------|-------------|
| <i>IDH1</i> -mutant   | Astrocytoma, <i>IDH1</i> -mutant                          | 257         |
|                       | Glioblastoma, <i>IDH1</i> -mutant                         | 93          |
|                       | Oligodendroglioma, <i>IDH1</i> -mutant & 1p/19q codeleted | 408         |
| <i>IDH1</i> -wildtype | Astrocytoma, <i>IDH1</i> -wildtype                        | 144         |
|                       | Glioblastoma, <i>IDH1</i> -wildtype                       | 1094        |

Supplementary Data Table 21: **Hierarchical label distribution of Glioma *IDH1* Mutation Prediction and Histomolecular Subtyping based on TCGA and EBRAINS.** The glioma *IDH1* mutation prediction task is developed using the first level of the hierarchy (“*IDH1* status” column), and the glioma histomolecular subtyping task is developed using the second level of the hierarchy (“Histomolecular Subtype” column), with both tasks using same train-validation-test folds created using the TCGA, with external evaluation on the EBRAINS Digital Tumor Atlas. All brain tumors in these tasks are designated as rare cancers by RARECARE and NCI-SEER.

| Encoder                 | Balanced ACC               | Weighted F1                | AUROC                      |
|-------------------------|----------------------------|----------------------------|----------------------------|
| ResNet-50 <sub>IN</sub> | 0.726 (0.652-0.797)        | 0.765 (0.678-0.837)        | 0.752 (0.659-0.842)        |
| CTransPath              | 0.897 (0.836-0.948)        | 0.907 (0.851-0.953)        | 0.930 (0.864-0.985)        |
| REMEDIS                 | 0.930 (0.884-0.969)        | 0.923 (0.877-0.962)        | <b>0.981 (0.947-1.000)</b> |
| UNI                     | <b>0.957 (0.911-0.991)</b> | <b>0.961 (0.922-0.992)</b> | 0.975 (0.937-1.000)        |

Supplementary Data Table 22: **Weakly-supervised breast metastasis detection based on CAMELYON16 (2 classes).** Pre-extracted patch features of each encoder with ABMIL were trained a custom train-validation split (90:10 ratio) of the official train set (270 slides) and tested on the official test set, with test performance ( $n = 129$ ) reported using balanced accuracy, weighted F1 score, and AUROC. Best performing model for each metric is bolded. 95% CI is included in parentheses.

| Encoder                 | Cohort | Balanced ACC               | Weighted F1                | AUROC                      |
|-------------------------|--------|----------------------------|----------------------------|----------------------------|
| ResNet-50 <sub>IN</sub> | TCGA   | 0.857 (0.787-0.929)        | 0.857 (0.786-0.929)        | 0.939 (0.893-0.978)        |
| CTransPath              | TCGA   | 0.949 (0.901-0.990)        | 0.949 (0.898-0.990)        | 0.993 (0.982-1.000)        |
| REMEDIS                 | TCGA   | 0.949 (0.902-0.990)        | 0.949 (0.898-0.990)        | 0.985 (0.953-1.000)        |
| UNI                     | TCGA   | <b>0.969 (0.932-1.000)</b> | <b>0.969 (0.929-1.000)</b> | <b>0.997 (0.989-1.000)</b> |
| ResNet-50 <sub>IN</sub> | CPTAC  | 0.852 (0.831-0.871)        | 0.849 (0.829-0.869)        | 0.924 (0.907-0.939)        |
| CTransPath              | CPTAC  | 0.884 (0.866-0.903)        | 0.881 (0.862-0.900)        | 0.953 (0.942-0.963)        |
| REMEDIS                 | CPTAC  | 0.854 (0.833-0.873)        | 0.849 (0.828-0.869)        | 0.951 (0.938-0.962)        |
| UNI                     | CPTAC  | <b>0.889 (0.870-0.908)</b> | <b>0.891 (0.872-0.909)</b> | <b>0.958 (0.946-0.969)</b> |

Supplementary Data Table 23: **Weakly-supervised NSCLC subtyping based on TCGA and CPTAC (2 classes).** Pre-extracted patch features of each encoder with ABMIL were trained and evaluated on the TCGA-NSCLC cohort (label-stratified into train-validation-test folds with 80:10:10 ratio, 848:97:98 slides), with external evaluation on slides ( $n = 1091$ ) sourced from CPTAC-LUAD ( $n = 578$ ) and CPTAC-LUSC ( $n = 513$ ). Test performance was reported using balanced accuracy, weighted F1 score, and AUROC. Best performing model for each metric is bolded. 95% CI is included in parentheses.

| Encoder                 | Cohort     | Balanced ACC               | Weighted F1                | AUROC                      |
|-------------------------|------------|----------------------------|----------------------------|----------------------------|
| ResNet-50 <sub>IN</sub> | TCGA       | 0.849 (0.734-0.940)        | 0.877 (0.814-0.938)        | 0.977 (0.954-0.993)        |
| CTransPath              | TCGA       | 0.892 (0.800-0.969)        | 0.907 (0.847-0.959)        | 0.987 (0.970-0.998)        |
| REMEDIS                 | TCGA       | <b>0.973 (0.937-1.000)</b> | <b>0.969 (0.927-1.000)</b> | <b>0.997 (0.992-1.000)</b> |
| UNI                     | TCGA       | 0.947 (0.875-0.994)        | 0.959 (0.918-0.990)        | 0.994 (0.984-1.000)        |
| ResNet-50 <sub>IN</sub> | CPTAC-DHMC | 0.824 (0.751-0.894)        | 0.903 (0.886-0.921)        | 0.972 (0.957-0.984)        |
| CTransPath              | CPTAC-DHMC | 0.939 (0.888-0.984)        | 0.968 (0.957-0.979)        | <b>0.996 (0.993-0.998)</b> |
| REMEDIS                 | CPTAC-DHMC | 0.790 (0.725-0.858)        | 0.934 (0.919-0.949)        | 0.988 (0.982-0.993)        |
| UNI                     | CPTAC-DHMC | <b>0.963 (0.930-0.987)</b> | <b>0.971 (0.960-0.981)</b> | 0.993 (0.985-0.998)        |

Supplementary Data Table 24: **Weakly-supervised RCC subtyping based on TCGA and CPTAC-DHMC (3 classes).** Pre-extracted patch features of each encoder with ABMIL were trained and evaluated on the TCGA-RCC cohort (label-stratified into train-validation-test folds with 80:10:10 ratio, 736:89:97 slides), with external evaluation on slides ( $n = 872$ ) sourced from CPTAC-CCRCC ( $n = 404$ ) and DHMC-Kidney ( $n = 468$ ) (CCRCC, CHRCC, and PRCC cases only). Test performance was reported using balanced accuracy, weighted F1 score, and AUROC. Best performing model for each metric is bolded. 95% CI is included in parentheses.

| Encoder                 | Balanced ACC               | Weighted F1                | AUROC                      |
|-------------------------|----------------------------|----------------------------|----------------------------|
| ResNet-50 <sub>IN</sub> | 0.346 (0.306-0.386)        | 0.478 (0.383-0.565)        | 0.818 (0.785-0.850)        |
| CTransPath              | 0.804 (0.743-0.879)        | 0.883 (0.823-0.937)        | 0.987 (0.976-0.995)        |
| REMEDIS                 | 0.865 (0.789-0.929)        | 0.877 (0.818-0.929)        | 0.973 (0.953-0.988)        |
| UNI                     | <b>0.919 (0.852-0.968)</b> | <b>0.926 (0.882-0.966)</b> | <b>0.993 (0.983-0.999)</b> |

Supplementary Data Table 25: **Weakly-supervised RCC subtyping based on DHMC (5 classes)**. Pre-extracted patch features of each encoder with ABMIL were trained and evaluated on a modified configuration of the official train-validation-test folds (70:4:26 ratio, 393:23:147 slides), with test performance ( $n = 147$  slides) reported using balanced accuracy, weighted F1 score, and AUROC. Since no CHRCC slides were included in the validation fold, 8 CHRCC slides from the training fold was moved to the validation fold. The test fold was unmodified. Best performing model for each metric is bolded. 95% CI is included in parentheses.

| Encoder                 | Balanced ACC               | Weighted F1                | AUROC                      |
|-------------------------|----------------------------|----------------------------|----------------------------|
| ResNet-50 <sub>IN</sub> | 0.250 (0.250-0.250)        | 0.356 (0.209-0.525)        | 0.671 (0.594-0.754)        |
| CTransPath              | 0.556 (0.454-0.651)        | 0.728 (0.603-0.841)        | 0.845 (0.779-0.898)        |
| REMEDIS                 | 0.604 (0.499-0.696)        | 0.787 (0.670-0.889)        | 0.888 (0.814-0.960)        |
| UNI                     | <b>0.643 (0.549-0.725)</b> | <b>0.824 (0.706-0.931)</b> | <b>0.957 (0.908-0.987)</b> |

Supplementary Data Table 26: **Weakly-supervised CRC screening based on HunCRC (4 classes)**. Pre-extracted patch features of each encoder with ABMIL were trained and evaluated on the HunCRC cohort (label-stratified into train-validation-test folds with 50:25:25 ratio, 100:50:50 slides). Test performance was reported using balanced accuracy, weighted F1 score, and AUROC. Best performing model for each metric is bolded. 95% CI is included in parentheses.

| Encoder                 | Balanced ACC               | Weighted F1                | AUROC                      |
|-------------------------|----------------------------|----------------------------|----------------------------|
| ResNet-50 <sub>IN</sub> | 0.552 (0.490-0.607)        | 0.516 (0.396-0.629)        | 0.748 (0.675-0.816)        |
| CTransPath              | 0.639 (0.554-0.728)        | 0.648 (0.536-0.763)        | 0.840 (0.776-0.903)        |
| REMEDIS                 | 0.676 (0.578-0.770)        | <b>0.696 (0.591-0.796)</b> | 0.864 (0.805-0.915)        |
| UNI                     | <b>0.687 (0.617-0.760)</b> | 0.691 (0.562-0.800)        | <b>0.887 (0.833-0.936)</b> |

Supplementary Data Table 27: **Weakly-supervised BRCA coarse-grained subtyping based on BRACS (3 classes)**. Pre-extracted patch features of each encoder with ABMIL were trained and evaluated on the official train-validation-test folds (72:12:16 ratio, 395:65:87 slides), with test performance ( $n = 87$  slides) reported using balanced accuracy, weighted F1 score, and AUROC. Best performing model for each metric is bolded. 95% CI is included in parentheses.

| Encoder                 | Balanced ACC               | Weighted F1                | AUROC                      |
|-------------------------|----------------------------|----------------------------|----------------------------|
| ResNet-50 <sub>IN</sub> | 0.248 (0.214-0.276)        | 0.216 (0.132-0.311)        | 0.701 (0.645-0.754)        |
| CTransPath              | 0.360 (0.284-0.440)        | 0.377 (0.280-0.485)        | 0.761 (0.706-0.809)        |
| REMEDIS                 | 0.398 (0.307-0.483)        | 0.428 (0.320-0.530)        | 0.749 (0.689-0.804)        |
| UNI                     | <b>0.468 (0.393-0.550)</b> | <b>0.486 (0.366-0.592)</b> | <b>0.837 (0.794-0.879)</b> |

Supplementary Data Table 28: **Weakly-supervised BRCA fine-grained subtyping based on BRACS (7 classes)**. Pre-extracted patch features of each encoder with ABMIL were trained and evaluated on the official train-validation-test (72:12:16 ratio, 395:65:87 slides), with test performance ( $n = 87$  slides) reported using balanced accuracy, weighted F1 score, and AUROC. Best performing model for each metric is bolded. 95% CI is included in parentheses.

| Encoder                 | Balanced ACC               | Quad. Weighted $\kappa$    | Weighted F1                | AUROC                      |
|-------------------------|----------------------------|----------------------------|----------------------------|----------------------------|
| ResNet-50 <sub>IN</sub> | 0.574 (0.544-0.603)        | 0.831 (0.799-0.859)        | 0.631 (0.599-0.661)        | 0.885 (0.873-0.897)        |
| CTransPath              | 0.691 (0.658-0.723)        | 0.927 (0.912-0.940)        | 0.752 (0.723-0.779)        | 0.938 (0.929-0.947)        |
| REMEDIS                 | 0.711 (0.679-0.742)        | 0.932 (0.918-0.945)        | 0.766 (0.737-0.794)        | 0.941 (0.931-0.949)        |
| UNI                     | <b>0.757 (0.726-0.785)</b> | <b>0.946 (0.933-0.957)</b> | <b>0.809 (0.783-0.834)</b> | <b>0.956 (0.947-0.963)</b> |

Supplementary Data Table 29: **Weakly-supervised ISUP grading based on PANDA (6 classes)**. Pre-extracted patch features of each encoder with ABMIL were trained and evaluated on label-stratified train-validation-test folds (80:10:10 ratio, 7,647:954:954 slides), with test performance (954 slides) reported using balanced accuracy, Cohen’s quadratic weighted  $\kappa$ , weighted F1 core, and ROC AUC. Best performing model for each metric is bolded. 95% CI is included in parentheses.

| Encoder                 | Cohort     | Balanced ACC               | Quad. Weighted $\kappa$    | Weighted F1                | AUROC                      |
|-------------------------|------------|----------------------------|----------------------------|----------------------------|----------------------------|
| ResNet-50 <sub>IN</sub> | Karolinska | 0.499 (0.466-0.531)        | 0.782 (0.737-0.821)        | 0.652 (0.620-0.682)        | 0.846 (0.830-0.861)        |
| CTransPath              | Karolinska | 0.675 (0.640-0.714)        | 0.914 (0.889-0.935)        | 0.809 (0.784-0.833)        | 0.923 (0.911-0.935)        |
| REMEDIS                 | Karolinska | <b>0.688 (0.653-0.723)</b> | 0.929 (0.910-0.944)        | <b>0.814 (0.788-0.839)</b> | 0.928 (0.916-0.939)        |
| UNI                     | Karolinska | 0.664 (0.630-0.697)        | <b>0.935 (0.920-0.946)</b> | 0.807 (0.781-0.833)        | <b>0.947 (0.937-0.956)</b> |
| ResNet-50 <sub>IN</sub> | Radboud    | 0.574 (0.545-0.603)        | 0.805 (0.768-0.840)        | 0.579 (0.542-0.614)        | 0.886 (0.876-0.897)        |
| CTransPath              | Radboud    | 0.722 (0.695-0.749)        | 0.913 (0.894-0.929)        | 0.731 (0.701-0.759)        | 0.946 (0.938-0.954)        |
| REMEDIS                 | Radboud    | 0.722 (0.695-0.750)        | 0.918 (0.899-0.933)        | 0.729 (0.700-0.758)        | 0.944 (0.937-0.952)        |
| UNI                     | Radboud    | <b>0.783 (0.757-0.809)</b> | <b>0.933 (0.919-0.947)</b> | <b>0.791 (0.764-0.817)</b> | <b>0.967 (0.962-0.972)</b> |

Supplementary Data Table 30: **Weakly-supervised ISUP grading based on PANDA (6 classes) using the same splits of public MIL baselines [90]**. Pre-extracted patch features of each encoder with ABMIL were trained and evaluated on label-stratified train-validation-test folds (60:20:20 ratio, 5,736:1,913:(1,026+877) slides) created by WholeSight [90], with test performance on Karolinska cohort (1,026 slides) and Radboud cohort (877 slides) reported separately using balanced accuracy, Cohen’s quadratic weighted  $\kappa$ , weighted F1 core, and ROC AUC. Best performing model for each metric is bolded. 95% CI is included in parentheses.

| Encoder                 | Cohort  | Balanced ACC               | Weighted F1                | AUROC                      |
|-------------------------|---------|----------------------------|----------------------------|----------------------------|
| ResNet-50 <sub>IN</sub> | TCGA    | 0.768 (0.710-0.821)        | 0.810 (0.767-0.850)        | 0.864 (0.825-0.901)        |
| CTransPath              | TCGA    | <b>0.891 (0.859-0.920)</b> | <b>0.862 (0.828-0.894)</b> | <b>0.958 (0.938-0.975)</b> |
| REMEDIS                 | TCGA    | 0.819 (0.770-0.869)        | 0.860 (0.824-0.897)        | 0.933 (0.907-0.956)        |
| UNI                     | TCGA    | 0.808 (0.760-0.855)        | 0.831 (0.794-0.867)        | 0.925 (0.898-0.949)        |
| ResNet-50 <sub>IN</sub> | EBRAINS | 0.759 (0.731-0.786)        | 0.777 (0.749-0.804)        | 0.822 (0.794-0.849)        |
| CTransPath              | EBRAINS | 0.836 (0.814-0.861)        | 0.819 (0.795-0.846)        | 0.924 (0.905-0.941)        |
| REMEDIS                 | EBRAINS | 0.792 (0.765-0.818)        | 0.822 (0.795-0.850)        | 0.895 (0.873-0.916)        |
| UNI                     | EBRAINS | <b>0.856 (0.836-0.878)</b> | <b>0.841 (0.820-0.864)</b> | <b>0.941 (0.925-0.955)</b> |

Supplementary Data Table 31: **Weakly-supervised GBMLGG *IDH1* mutation prediction based on TCGA and EBRAINS (2 classes)**. Pre-extracted patch features of each encoder with ABMIL were trained and evaluated on the TCGA-GBMLGG cohort (site-stratified into train-validation-test folds with 47:22:33 ratio, 525:243:355 slides), with external evaluation on slides ( $n = 873$ ) sourced from the EBRAINS Digital Tumor Atlas (using slides with available *IDH1* status). Test performance was reported using balanced accuracy, weighted F1 score, and AUROC. Best performing model for each metric is bolded. 95% CI is included in parentheses.

| Encoder                 | Cohort  | Balanced ACC               | Weighted F1                | AUROC                      |
|-------------------------|---------|----------------------------|----------------------------|----------------------------|
| ResNet-50 <sub>IN</sub> | TCGA    | 0.412 (0.362-0.462)        | 0.660 (0.611-0.715)        | 0.814 (0.783-0.847)        |
| CTransPath              | TCGA    | 0.487 (0.437-0.543)        | 0.718 (0.671-0.769)        | 0.866 (0.831-0.905)        |
| REMEDIS                 | TCGA    | 0.415 (0.382-0.448)        | 0.675 (0.628-0.727)        | 0.837 (0.811-0.864)        |
| UNI                     | TCGA    | <b>0.673 (0.616-0.732)</b> | <b>0.794 (0.751-0.838)</b> | <b>0.910 (0.880-0.939)</b> |
| ResNet-50 <sub>IN</sub> | EBRAINS | 0.402 (0.379-0.423)        | 0.615 (0.581-0.648)        | 0.684 (0.654-0.713)        |
| CTransPath              | EBRAINS | 0.498 (0.472-0.523)        | 0.705 (0.674-0.735)        | 0.823 (0.798-0.845)        |
| REMEDIS                 | EBRAINS | 0.337 (0.320-0.354)        | 0.551 (0.517-0.586)        | 0.751 (0.723-0.777)        |
| UNI                     | EBRAINS | <b>0.562 (0.535-0.594)</b> | <b>0.728 (0.702-0.755)</b> | <b>0.868 (0.848-0.887)</b> |

Supplementary Data Table 32: **Weakly-supervised GBMLGG histomolecular subtyping based on TCGA and EBRAINS (5 classes)**. Pre-extracted patch features of each encoder with ABMIL were trained and evaluated on the TCGA-GBMLGG cohort (site-stratified into train-validation-test folds with 47:22:33 ratio, 525:243:355 slides), with external evaluation on slides ( $n = 873$ ) sourced from the EBRAINS Digital Tumor Atlas (using slides with available *IDH1* status). Test performance was reported using balanced accuracy, weighted F1 score, and AUROC. Best performing model for each metric is bolded. 95% CI is included in parentheses.



| Encoder                 | Balanced ACC               | Weighted F1                | AUROC                      |
|-------------------------|----------------------------|----------------------------|----------------------------|
| ResNet-50 <sub>IN</sub> | 0.302 (0.273-0.334)        | 0.556 (0.509-0.600)        | 0.878 (0.860-0.896)        |
| CTransPath              | 0.666 (0.608-0.722)        | 0.795 (0.758-0.829)        | 0.968 (0.957-0.978)        |
| REMEDIS                 | 0.687 (0.638-0.734)        | 0.789 (0.753-0.824)        | 0.967 (0.952-0.979)        |
| UNI                     | <b>0.883 (0.838-0.924)</b> | <b>0.926 (0.902-0.947)</b> | <b>0.996 (0.994-0.998)</b> |

Supplementary Data Table 33: **Weakly-supervised coarse-grained brain tumor subtyping based on EBRAINS (12 classes)**. Pre-extracted patch features of each encoder with ABMIL were trained and evaluated on the EBRAINS Digital Tumor Atlas (label-stratified into train-validation-test folds with 50:25:25 ratio, 1,151:595:573 slides), with test performance reported using balanced accuracy, weighted F1 score, and AUROC. Best performing model for each metric is bolded. 95% CI is included in parentheses.

| Encoder                 | Balanced ACC               | Weighted F1                | AUROC                      |
|-------------------------|----------------------------|----------------------------|----------------------------|
| ResNet-50 <sub>IN</sub> | 0.219 (0.195-0.241)        | 0.300 (0.259-0.339)        | 0.893 (0.879-0.907)        |
| CTransPath              | 0.514 (0.473-0.559)        | 0.597 (0.548-0.638)        | 0.959 (0.950-0.967)        |
| REMEDIS                 | 0.382 (0.346-0.415)        | 0.471 (0.428-0.512)        | 0.917 (0.901-0.931)        |
| UNI                     | <b>0.675 (0.633-0.715)</b> | <b>0.746 (0.704-0.783)</b> | <b>0.976 (0.969-0.982)</b> |

Supplementary Data Table 34: **Weakly-supervised fine-grained brain tumor subtyping based on EBRAINS (30 classes)**. Pre-extracted patch features of each encoder with ABMIL were trained and evaluated on the EBRAINS Digital Tumor Atlas (label-stratified into train-validation-test folds with 50:25:25 ratio, 1151:595:573 slides), with test performance reported using balanced accuracy, weighted F1 score, and AUROC. Best performing model for each metric is bolded. 95% CI is included in parentheses.

| Encoder                 | Balanced ACC               | Weighted F1                | AUROC                      |
|-------------------------|----------------------------|----------------------------|----------------------------|
| ResNet-50 <sub>IN</sub> | 0.861 (0.822-0.898)        | 0.861 (0.822-0.898)        | 0.930 (0.903-0.955)        |
| CTransPath              | 0.882 (0.847-0.916)        | 0.882 (0.846-0.916)        | 0.937 (0.909-0.961)        |
| REMEDIS                 | 0.861 (0.823-0.895)        | 0.861 (0.822-0.895)        | 0.933 (0.908-0.958)        |
| UNI                     | <b>0.896 (0.864-0.927)</b> | <b>0.894 (0.862-0.925)</b> | <b>0.962 (0.944-0.979)</b> |

Supplementary Data Table 35: **Weakly-supervised cellular-mediated allograft rejection of endomyocardial biopsies based on in-house BWH data (2 classes)**. Pre-extracted patch features of each encoder with ABMIL were trained and evaluated on case- and label-stratified train-validation-test folds (3,547:484:990 slides, 1,192:164:332 patients), with test performance (332 patients) reported using balanced accuracy, weighted F1 core, and ROC AUC. Best performing model for each metric is bolded. 95% CI is included in parentheses.

| Method                                 | Encoder                     | Mag.  | Reported By                                                    | ACC          | AUROC        |
|----------------------------------------|-----------------------------|-------|----------------------------------------------------------------|--------------|--------------|
| Avg. Pathologist (w/ TC) <sup>†</sup>  | -                           | -     | Bejnordi <i>et al.</i> 2017 <a href="#">78</a>                 | -            | 0.810        |
| Avg. Pathologist (w/o TC) <sup>†</sup> | -                           | -     | Bejnordi <i>et al.</i> 2017 <a href="#">78</a>                 | -            | 0.966        |
| Full Sup. CNN-RF <sup>†</sup>          | GoogLeNet                   | 20×   | Wang <i>et al.</i> 2017 <a href="#">176</a> <a href="#">78</a> | -            | 0.923        |
| Full Sup. CNN-RF <sup>†</sup>          | ResNet-101                  | 20×   | Bejnordi <i>et al.</i> 2017 <a href="#">78</a>                 | -            | 0.976        |
| Full Sup. CNN-RF <sup>†</sup>          | GoogLeNet                   | 20×   | Bejnordi <i>et al.</i> 2017 <a href="#">78</a>                 | -            | <b>0.994</b> |
| Full Sup. CNN ensemble                 | -                           | Multi | Koohbanani <i>et al.</i> 2019 <a href="#">177</a>              | -            | 0.990        |
| Full Sup. CNN-RF <sup>†</sup> ,#       | ResNet-34                   | 20×   | Campanella <i>et al.</i> 2019 <a href="#">81</a>               | -            | 0.930        |
| NIC                                    | BiGAN                       | 20×   | Tellez <i>et al.</i> 2019 <a href="#">51</a>                   | -            | 0.704        |
| E2E MIL-RNN <sup>‡</sup> ,#            | ResNet-34                   | 20×   | Campanella <i>et al.</i> 2019 <a href="#">81</a>               | -            | 0.899        |
| CLAM                                   | ResNet-50 <sub>IN</sub>     | 40×   | Lu <i>et al.</i> 2021 <a href="#">15</a>                       | -            | 0.936        |
| DSMIL-LC                               | ResNet-50 <sub>SimCLR</sub> | Multi | Li <i>et al.</i> 2021 <a href="#">42</a>                       | 0.899        | 0.917        |
| TransMIL                               | ResNet-50 <sub>IN</sub>     | 20×   | Shao <i>et al.</i> 2021 <a href="#">80</a>                     | 0.884        | 0.931        |
| Additive-MIL                           | ShuffleNet <sub>IN</sub>    | 10×   | Javed <i>et al.</i> 2022 <a href="#">178</a>                   | 0.830        | 0.846        |
| DTFD-MIL (AFS)                         | ResNet-50 <sub>IN</sub>     | 20×   | Zhang <i>et al.</i> 2022 <a href="#">179</a>                   | 0.908        | 0.946        |
| SCL-WC                                 | CTransPath                  | 10×   | Wang <i>et al.</i> 2022 <a href="#">112</a>                    | 0.914        | 0.957        |
| Bayes-MIL (APCRF)*                     | ResNet-50 <sub>IN</sub>     | 20×   | Cui <i>et al.</i> 2023 <a href="#">180</a>                     | 0.900        | 0.948        |
| ILRA-MIL (LRC)                         | ResNet-50 <sub>IN</sub>     | 10×   | Xiang <i>et al.</i> 2023 <a href="#">96</a>                    | 0.922        | 0.965        |
| TransMIL (FT)                          | ResNet-50 <sub>IN</sub>     | 20×   | Li <i>et al.</i> 2023 <a href="#">57</a>                       | -            | 0.967        |
| TransMIL (IBMIL)                       | CTransPath                  | 20×   | Lin <i>et al.</i> 2023 <a href="#">128</a>                     | <b>0.961</b> | 0.970        |
| DSMIL (MHIM-MIL)*                      | ResNet-50 <sub>IN</sub>     | 20×   | Tang <i>et al.</i> 2023 <a href="#">181</a>                    | 0.925        | 0.965        |
| ABMIL                                  | UNI                         | 20×   | Ours                                                           | <b>0.961</b> | <b>0.975</b> |

Supplementary Data Table 36: **A comparison of retrospective and current results for metastasis detection in CAMELYON16.** We compare UNI (results from **Extended Data Table 22**, same splits) with the leaderboard taken at the time of the CAMELYON16 challenge (**Top**), as well as a chronological timeline of best-performing models reported in recent CPath and computer vision literature that evaluate CAMELYON16 (**Middle**). In surveying the literature, our reported UNI performance achieves the best performance for a weakly-supervised MIL model (without considering further improvements to itself), and is one of the few MIL results that outperform the average pathologist performance without time constraints. In comparing against other MIL results (**Bottom**), we note that many comparisons are not equivalent due to being developed with ResNet-50<sub>IN</sub> or other encoders, as well as differences in MIL architecture and training hyper-parameters. † = Used pixel-level annotations. ‡ = MIL-based and trained end-to-end. # = Trained on an external cohort, with C16 test set used as independent test set. \* = Did not evaluate on the official test set.

| Method                               | Encoder                 | Cohort     | Quad. Weighted $\kappa$ |
|--------------------------------------|-------------------------|------------|-------------------------|
| ABMIL                                | ResNet-50 <sub>IN</sub> | Karolinska | 0.773                   |
| CLAM                                 | ResNet-50 <sub>IN</sub> | Karolinska | 0.828                   |
| TransMIL                             | ResNet-50 <sub>IN</sub> | Karolinska | 0.761                   |
| Additive-MIL <a href="#">178</a>     | ResNet-50 <sub>IN</sub> | Karolinska | 0.786                   |
| NAGCN <a href="#">182</a>            | ResNet-50 <sub>IN</sub> | Karolinska | 0.655                   |
| GraphTransformer <a href="#">183</a> | ResNet-50 <sub>IN</sub> | Karolinska | 0.813                   |
| WholeSight <a href="#">90</a>        | ResNet-50 <sub>IN</sub> | Karolinska | 0.813                   |
| ABMIL                                | UNI                     | Karolinska | <b>0.935</b>            |
| ABMIL                                | ResNet-50 <sub>IN</sub> | Radboud    | 0.738                   |
| CLAM                                 | ResNet-50 <sub>IN</sub> | Radboud    | 0.786                   |
| TransMIL                             | ResNet-50 <sub>IN</sub> | Radboud    | 0.732                   |
| Additive-MIL <a href="#">178</a>     | ResNet-50 <sub>IN</sub> | Radboud    | 0.760                   |
| NAGCN <a href="#">182</a>            | ResNet-50 <sub>IN</sub> | Radboud    | 0.762                   |
| GraphTransformer <a href="#">183</a> | ResNet-50 <sub>IN</sub> | Radboud    | 0.818                   |
| WholeSight <a href="#">90</a>        | ResNet-50 <sub>IN</sub> | Radboud    | 0.829                   |
| ABMIL                                | UNI                     | Radboud    | <b>0.933</b>            |

Supplementary Data Table 37: **Comparison with existing baselines for weakly-supervised ISUP grading based on PANDA (6 classes).** We compare UNI (results from **Extended Data Table 30**, same splits) with existing baselines on this task using the same splits as WholeSIGHT [90](#). All of the baselines developed in WholeSIGHT used ResNet-50<sub>IN</sub> features, with evaluation performed on the Karolinska and Radboud cohort separately.

| Method                   | Encoder                 | ACC          | AUROC        |
|--------------------------|-------------------------|--------------|--------------|
| CRANE <a href="#">86</a> | ResNet-50 <sub>IN</sub> | 0.893        | 0.958        |
| ABMIL                    | UNI                     | <b>0.895</b> | <b>0.962</b> |

Supplementary Data Table 38: **Comparison with existing baselines for cellular-mediated allograft rejection from BWH-EMB (2 classes).** We compare UNI (results from **Extended Data Table 35**, same splits) with the original baseline on this task, CRANE [86](#), which used ResNet-50<sub>IN</sub> features.

| Encoder                 | Balanced ACC               | Weighted F1                | AUROC                      |
|-------------------------|----------------------------|----------------------------|----------------------------|
| ResNet-50 <sub>IN</sub> | 0.715 (0.705-0.724)        | 0.771 (0.761-0.781)        | 0.958 (0.954-0.961)        |
| CTransPath              | 0.845 (0.836-0.853)        | 0.867 (0.859-0.875)        | <b>0.991 (0.990-0.992)</b> |
| REMEDIS                 | 0.787 (0.776-0.796)        | 0.802 (0.793-0.811)        | 0.980 (0.979-0.982)        |
| UNI                     | <b>0.874 (0.866-0.881)</b> | <b>0.875 (0.868-0.882)</b> | 0.990 (0.988-0.991)        |

Supplementary Data Table 39: **Linear probe evaluation for CRC tissue classification based on CRC-100K (9 classes)**. Pre-extracted patch features of each encoder with logistic regression were evaluated on the official train-test folds (100,000:7,180), with test performance (n=7,180 ROIs) reported using balanced accuracy, weighted F1 score, and AUROC. Best performing model for each metric is bolded. 95% CI is included in parentheses.

| Encoder                 | 1-NN Balanced ACC          | 1-NN Weighted F1           | 20-NN Balanced ACC         | 20-NN Weighted F1          |
|-------------------------|----------------------------|----------------------------|----------------------------|----------------------------|
| ResNet-50 <sub>IN</sub> | 0.686 (0.676-0.696)        | 0.698 (0.686-0.708)        | 0.797 (0.787-0.806)        | 0.833 (0.825-0.841)        |
| CTransPath              | 0.815 (0.806-0.824)        | 0.845 (0.836-0.854)        | 0.836 (0.828-0.843)        | 0.848 (0.840-0.857)        |
| REMEDIS                 | 0.855 (0.848-0.863)        | 0.881 (0.873-0.888)        | 0.908 (0.901-0.915)        | 0.924 (0.918-0.931)        |
| UNI                     | <b>0.899 (0.892-0.905)</b> | <b>0.912 (0.906-0.919)</b> | <b>0.924 (0.917-0.931)</b> | <b>0.945 (0.940-0.950)</b> |

Supplementary Data Table 40: **SimpleShot and KNN evaluation for CRC tissue classification based on CRC-100K (9 classes)**. Pre-extracted patch features of each encoder with SimpleShot (nearest centroid,  $K=1$ ) and Nearest Neighbors ( $K=20$ ) were evaluated on the official train-test folds (100,000:7,180 ROIs), with test performance (n=7,180 ROIs) reported using balanced accuracy and weighted F1 score. Best performing model for each metric is bolded. 95% CI is included in parentheses.

| Encoder                 | Cohort             | Balanced ACC               | Weighted F1                | AUROC                      |
|-------------------------|--------------------|----------------------------|----------------------------|----------------------------|
| ResNet-50 <sub>IN</sub> | Val <sub>OD</sub>  | 0.832 (0.828-0.836)        | 0.830 (0.826-0.834)        | 0.936 (0.934-0.938)        |
| CTransPath              | Val <sub>OD</sub>  | 0.917 (0.914-0.920)        | 0.917 (0.914-0.919)        | 0.983 (0.982-0.984)        |
| REMEDIS                 | Val <sub>OD</sub>  | 0.959 (0.957-0.961)        | 0.959 (0.957-0.961)        | 0.992 (0.992-0.993)        |
| UNI                     | Val <sub>OD</sub>  | <b>0.974 (0.973-0.976)</b> | <b>0.974 (0.973-0.976)</b> | <b>0.996 (0.995-0.997)</b> |
| ResNet-50 <sub>IN</sub> | Test <sub>OD</sub> | 0.906 (0.904-0.908)        | 0.906 (0.904-0.908)        | 0.964 (0.963-0.965)        |
| CTransPath              | Test <sub>OD</sub> | 0.960 (0.959-0.961)        | 0.960 (0.959-0.961)        | 0.991 (0.990-0.992)        |
| REMEDIS                 | Test <sub>OD</sub> | 0.926 (0.925-0.928)        | 0.926 (0.924-0.928)        | 0.983 (0.983-0.984)        |
| UNI                     | Test <sub>OD</sub> | <b>0.983 (0.982-0.984)</b> | <b>0.983 (0.982-0.984)</b> | <b>0.996 (0.996-0.997)</b> |

Supplementary Data Table 41: **Linear probe evaluation for pan-cancer tissue classification based on CAMELYON17-WILDS (2 classes)**. Pre-extracted patch features of each encoder with logistic regression were evaluated on the WILDS train-validation-test folds [164]. The training set contains 302,436 patches from 3 hospitals (50:50 ratio), and the model is evaluated on two out-of-domain validation (Val<sub>OD</sub>) and test (Test<sub>OD</sub>) folds containing 34,904 patches (50:50 ratio) and 85,054 patches (50:50 ratio) collected from two other hospitals respectively. The in-domain validation fold was not combined with the training set or used for hyper-parameter tuning. The performance is reported using balanced accuracy, weighted F1 score, and AUROC. Best performing model for each metric is bolded. 95% CI is included in parentheses.

| Encoder                 | Cohort             | 1-NN Balanced ACC          | 1-NN Weighted F1           | 20-NN Balanced ACC         | 20-NN Weighted F1          |
|-------------------------|--------------------|----------------------------|----------------------------|----------------------------|----------------------------|
| ResNet-50 <sub>IN</sub> | Val <sub>OD</sub>  | 0.727 (0.723-0.732)        | 0.721 (0.717-0.726)        | 0.809 (0.805-0.813)        | 0.804 (0.800-0.808)        |
| CTransPath              | Val <sub>OD</sub>  | 0.797 (0.794-0.801)        | 0.789 (0.785-0.794)        | 0.873 (0.870-0.876)        | 0.872 (0.868-0.875)        |
| REMEDIS                 | Val <sub>OD</sub>  | 0.830 (0.826-0.834)        | 0.827 (0.823-0.831)        | 0.883 (0.879-0.886)        | 0.882 (0.878-0.885)        |
| UNI                     | Val <sub>OD</sub>  | <b>0.904 (0.902-0.907)</b> | <b>0.904 (0.900-0.907)</b> | <b>0.968 (0.966-0.970)</b> | <b>0.968 (0.966-0.970)</b> |
| ResNet-50 <sub>IN</sub> | Test <sub>OD</sub> | 0.725 (0.722-0.728)        | 0.716 (0.713-0.719)        | 0.867 (0.865-0.869)        | 0.865 (0.863-0.867)        |
| CTransPath              | Test <sub>OD</sub> | 0.920 (0.918-0.922)        | 0.919 (0.918-0.921)        | 0.917 (0.915-0.919)        | 0.917 (0.915-0.919)        |
| REMEDIS                 | Test <sub>OD</sub> | <b>0.958 (0.956-0.959)</b> | <b>0.958 (0.956-0.959)</b> | 0.939 (0.938-0.941)        | 0.939 (0.937-0.941)        |
| UNI                     | Test <sub>OD</sub> | 0.955 (0.954-0.957)        | 0.955 (0.954-0.957)        | <b>0.972 (0.971-0.973)</b> | <b>0.972 (0.971-0.973)</b> |

Supplementary Data Table 42: **SimpleShot and KNN evaluation for breast metastasis detection based on CAMELYON17-WILDS (2 classes)**. Pre-extracted patch features of each encoder with SimpleShot (nearest centroid,  $K=1$ ) and Nearest Neighbors ( $K=20$ ) were evaluated on the WILDS train-validation-test folds [164]. The training set contains 302,436 patches from 3 hospitals (50:50 ratio), and the model is evaluated on two out-of-domain (OD) validation and test folds containing 34,904 patches (50:50 ratio) and 85,054 patches (50:50 ratio) collected from two other hospitals respectively. The in-domain validation fold was not combined with the training set or used for hyper-parameter tuning. The performance is reported using balanced accuracy, weighted F1 score, and AUROC. Best performing model for each metric is bolded. 95% CI is included in parentheses.

| Encoder                 | Balanced ACC               | Weighted F1                | AUROC                      |
|-------------------------|----------------------------|----------------------------|----------------------------|
| ResNet-50 <sub>IN</sub> | 0.770 (0.761-0.779)        | 0.733 (0.722-0.745)        | 0.937 (0.932-0.941)        |
| CTransPath              | 0.802 (0.791-0.812)        | 0.783 (0.773-0.793)        | 0.939 (0.934-0.943)        |
| REMEDIS                 | 0.729 (0.717-0.740)        | 0.744 (0.733-0.754)        | 0.906 (0.899-0.912)        |
| UNI                     | <b>0.890 (0.883-0.898)</b> | <b>0.880 (0.871-0.888)</b> | <b>0.979 (0.977-0.981)</b> |

Supplementary Data Table 43: **Linear probe evaluation for CCRCC tissue classification based on TCGA and HEL (3 classes)**. Pre-extracted patch features of each encoder with logistic regression were evaluated on the TCGA cohort as the train fold and HEL cohort as the test fold (89:11 ratio, 24,201:2,968 ROIs), with test performance (n=2,968 ROIs) reported using balanced accuracy, weighted F1 score, and AUROC. Best performing model for each metric is bolded. 95% CI is included in parentheses.

| Encoder                 | 1-NN Balanced ACC          | 1-NN Weighted F1           | 20-NN Balanced ACC         | 20-NN Weighted F1          |
|-------------------------|----------------------------|----------------------------|----------------------------|----------------------------|
| ResNet-50 <sub>IN</sub> | 0.765 (0.755-0.775)        | 0.741 (0.730-0.751)        | 0.680 (0.670-0.690)        | 0.641 (0.629-0.653)        |
| CTransPath              | 0.679 (0.667-0.691)        | 0.653 (0.639-0.665)        | 0.697 (0.686-0.708)        | 0.679 (0.668-0.690)        |
| REMEDIS                 | 0.785 (0.775-0.795)        | 0.788 (0.778-0.798)        | 0.833 (0.823-0.843)        | 0.827 (0.816-0.836)        |
| UNI                     | <b>0.801 (0.790-0.810)</b> | <b>0.801 (0.791-0.811)</b> | <b>0.866 (0.857-0.875)</b> | <b>0.860 (0.851-0.868)</b> |

Supplementary Data Table 44: **SimpleShot and KNN evaluation for CCRCC tissue classification based on TCGA and HEL (3 classes)**. Pre-extracted patch features of each encoder with SimpleShot (nearest centroid,  $K=1$ ) and Nearest Neighbors ( $K=20$ ) were evaluated on the TCGA cohort as the train fold and HEL cohort as the test fold (89:11 ratio, 24,201:2,968 ROIs), with test performance (n=2,968 ROIs) reported using balanced accuracy and weighted F1 score. Best performing model for each metric is bolded. 95% CI is included in parentheses.

| Encoder                 | Img Res. | Balanced ACC               | Weighted F1                | AUROC                      |
|-------------------------|----------|----------------------------|----------------------------|----------------------------|
| ResNet-50 <sub>IN</sub> | 224      | 0.738 (0.634-0.824)        | 0.733 (0.630-0.828)        | 0.911 (0.854-0.954)        |
| CTransPath              | 224      | 0.875 (0.804-0.939)        | 0.872 (0.796-0.937)        | 0.982 (0.967-0.994)        |
| REMEDIS                 | 224      | 0.863 (0.782-0.933)        | 0.864 (0.786-0.937)        | 0.981 (0.959-0.997)        |
| UNI                     | 224      | <b>0.925 (0.856-0.976)</b> | <b>0.926 (0.866-0.975)</b> | <b>0.994 (0.983-1.000)</b> |
| ResNet-50 <sub>IN</sub> | 448      | 0.712 (0.610-0.810)        | 0.714 (0.610-0.815)        | 0.901 (0.841-0.951)        |
| CTransPath              | 448      | 0.863 (0.785-0.933)        | 0.864 (0.790-0.937)        | 0.973 (0.946-0.992)        |
| REMEDIS                 | 448      | 0.913 (0.845-0.970)        | 0.913 (0.842-0.964)        | 0.997 (0.990-1.000)        |
| UNI                     | 448      | <b>0.950 (0.898-0.989)</b> | <b>0.950 (0.901-0.988)</b> | <b>0.998 (0.995-1.000)</b> |
| ResNet-50 <sub>IN</sub> | 896      | 0.600 (0.484-0.704)        | 0.607 (0.496-0.711)        | 0.848 (0.777-0.909)        |
| CTransPath              | 896      | 0.788 (0.688-0.868)        | 0.791 (0.695-0.866)        | 0.949 (0.909-0.978)        |
| REMEDIS                 | 896      | 0.825 (0.741-0.900)        | 0.830 (0.748-0.902)        | 0.960 (0.926-0.984)        |
| UNI                     | 896      | <b>0.925 (0.858-0.976)</b> | <b>0.926 (0.862-0.975)</b> | <b>0.996 (0.990-1.000)</b> |
| ResNet-50 <sub>IN</sub> | 1344     | 0.587 (0.464-0.697)        | 0.593 (0.478-0.697)        | 0.829 (0.754-0.894)        |
| CTransPath              | 1344     | 0.650 (0.547-0.749)        | 0.656 (0.554-0.753)        | 0.879 (0.817-0.929)        |
| REMEDIS                 | 1344     | 0.812 (0.721-0.886)        | 0.821 (0.728-0.891)        | 0.966 (0.936-0.987)        |
| UNI                     | 1344     | <b>0.900 (0.829-0.960)</b> | <b>0.901 (0.829-0.962)</b> | <b>0.987 (0.970-0.997)</b> |

Supplementary Data Table 45: **Linear probe evaluation for BRCA subtyping based on BACH (4 classes)**. Pre-extracted patch features of each encoder with logistic regression were evaluated on label-stratified train-test folds (80:20 ratio, 320:80 ROIs) across multiple image resolutions (without stain normalization), with test performance (n=80 ROIs) reported using balanced accuracy, weighted F1 score, and AUROC. Best performing model for each metric is bolded. 95% CI is included in parentheses.

| Encoder                 | Img Res. | 1-NN Balanced ACC          | 1-NN Weighted F1           | 20-NN Balanced ACC         | 20-NN Weighted F1          |
|-------------------------|----------|----------------------------|----------------------------|----------------------------|----------------------------|
| ResNet-50 <sub>IN</sub> | 224      | 0.588 (0.484-0.688)        | 0.579 (0.455-0.685)        | 0.625 (0.516-0.723)        | 0.618 (0.504-0.723)        |
| CTransPath              | 224      | 0.750 (0.662-0.834)        | 0.739 (0.635-0.834)        | 0.750 (0.656-0.837)        | 0.745 (0.640-0.838)        |
| REMEDIS                 | 224      | 0.650 (0.550-0.742)        | 0.628 (0.506-0.741)        | 0.825 (0.741-0.904)        | 0.823 (0.735-0.901)        |
| UNI                     | 224      | <b>0.812 (0.725-0.896)</b> | <b>0.813 (0.723-0.897)</b> | <b>0.900 (0.825-0.962)</b> | <b>0.902 (0.830-0.962)</b> |
| ResNet-50 <sub>IN</sub> | 448      | 0.600 (0.497-0.697)        | 0.585 (0.471-0.703)        | 0.613 (0.506-0.717)        | 0.601 (0.483-0.716)        |
| CTransPath              | 448      | 0.725 (0.630-0.814)        | 0.713 (0.599-0.819)        | 0.775 (0.682-0.863)        | 0.771 (0.671-0.862)        |
| REMEDIS                 | 448      | 0.575 (0.460-0.680)        | 0.569 (0.452-0.680)        | 0.687 (0.578-0.784)        | 0.688 (0.583-0.782)        |
| UNI                     | 448      | <b>0.887 (0.812-0.948)</b> | <b>0.888 (0.813-0.950)</b> | <b>0.912 (0.841-0.965)</b> | <b>0.912 (0.838-0.963)</b> |
| ResNet-50 <sub>IN</sub> | 896      | 0.587 (0.486-0.688)        | 0.565 (0.448-0.691)        | 0.538 (0.429-0.636)        | 0.520 (0.399-0.638)        |
| CTransPath              | 896      | 0.650 (0.545-0.742)        | 0.641 (0.531-0.745)        | 0.725 (0.622-0.811)        | 0.728 (0.624-0.817)        |
| REMEDIS                 | 896      | 0.562 (0.451-0.667)        | 0.568 (0.452-0.673)        | 0.625 (0.514-0.726)        | 0.638 (0.530-0.732)        |
| UNI                     | 896      | <b>0.850 (0.768-0.925)</b> | <b>0.849 (0.766-0.925)</b> | <b>0.887 (0.813-0.950)</b> | <b>0.885 (0.806-0.950)</b> |
| ResNet-50 <sub>IN</sub> | 1344     | 0.525 (0.422-0.619)        | 0.507 (0.390-0.621)        | 0.475 (0.365-0.574)        | 0.474 (0.363-0.577)        |
| CTransPath              | 1344     | 0.587 (0.478-0.691)        | 0.591 (0.478-0.701)        | 0.562 (0.444-0.663)        | 0.571 (0.460-0.674)        |
| REMEDIS                 | 1344     | 0.487 (0.371-0.594)        | 0.503 (0.386-0.613)        | 0.500 (0.389-0.610)        | 0.512 (0.398-0.616)        |
| UNI                     | 1344     | <b>0.812 (0.722-0.892)</b> | <b>0.808 (0.710-0.889)</b> | <b>0.837 (0.749-0.914)</b> | <b>0.836 (0.750-0.913)</b> |

Supplementary Data Table 46: **SimpleShot and KNN evaluation for BRCA subtyping based on BACH (4 classes)**. Pre-extracted patch features of each encoder with SimpleShot (nearest centroid,  $K=1$ ) and Nearest Neighbors ( $K=20$ ) were evaluated on label-stratified train-test folds (80:20 ratio, 320:80 ROIs) across multiple image resolutions (without stain normalization), with test performance (n=80 ROIs) reported using balanced accuracy and weighted F1 score. Best performing model for each metric is bolded. 95% CI is included in parentheses.

| Encoder                 | Balanced ACC               | Weighted F1                | AUROC                      |
|-------------------------|----------------------------|----------------------------|----------------------------|
| ResNet-50 <sub>IN</sub> | 0.265 (0.259-0.271)        | 0.787 (0.781-0.793)        | 0.830 (0.822-0.839)        |
| CTransPath              | 0.422 (0.409-0.435)        | 0.828 (0.823-0.833)        | 0.881 (0.874-0.889)        |
| REMEDIS                 | 0.410 (0.395-0.424)        | 0.816 (0.811-0.821)        | 0.836 (0.827-0.845)        |
| UNI                     | <b>0.465 (0.449-0.481)</b> | <b>0.844 (0.838-0.848)</b> | <b>0.888 (0.879-0.896)</b> |

Supplementary Data Table 47: **Linear probe evaluation for CRC tissue classification based on HunCRC (9 classes)**. Pre-extracted patch features of each encoder with logistic regression were evaluated on case-stratified train-test folds (77:23 ratio, 76,753:22,655 ROIs), with test performance (n=22,655 ROIs) reported using balanced accuracy, weighted F1 score, and AUROC. Best performing model for each metric is bolded. 95% CI is included in parentheses.

| Encoder                 | 1-NN Balanced ACC          | 1-NN Weighted F1           | 20-NN Balanced ACC         | 20-NN Weighted F1          |
|-------------------------|----------------------------|----------------------------|----------------------------|----------------------------|
| ResNet-50 <sub>IN</sub> | 0.421 (0.398-0.446)        | 0.570 (0.563-0.576)        | 0.379 (0.363-0.393)        | 0.775 (0.769-0.781)        |
| CTransPath              | <b>0.496 (0.475-0.517)</b> | 0.695 (0.690-0.701)        | 0.437 (0.425-0.453)        | 0.806 (0.800-0.811)        |
| REMEDIS                 | 0.445 (0.426-0.467)        | 0.681 (0.675-0.687)        | 0.400 (0.385-0.414)        | 0.805 (0.800-0.810)        |
| UNI                     | 0.470 (0.451-0.492)        | <b>0.747 (0.741-0.752)</b> | <b>0.448 (0.434-0.461)</b> | <b>0.831 (0.826-0.836)</b> |

Supplementary Data Table 48: **SimpleShot and KNN evaluation for CRC tissue classification based on HunCRC (9 classes)**. Pre-extracted patch features of each encoder with SimpleShot (nearest centroid,  $K=1$ ) and Nearest Neighbors ( $K=20$ ) were evaluated on case-stratified train-test folds (77:23 ratio, 76,753:22,655 ROIs), with test performance (n=22,655 ROIs) reported using balanced accuracy and weighted F1 score. Best performing model for each metric is bolded. 95% CI is included in parentheses.

| Encoder                 | Balanced ACC               | Weighted F1                | AUROC                      |
|-------------------------|----------------------------|----------------------------|----------------------------|
| ResNet-50 <sub>IN</sub> | 0.576 (0.573-0.579)        | 0.853 (0.852-0.855)        | 0.938 (0.936-0.940)        |
| CTransPath              | 0.728 (0.723-0.734)        | 0.925 (0.924-0.926)        | 0.964 (0.963-0.966)        |
| REMEDIS                 | 0.774 (0.768-0.779)        | 0.879 (0.878-0.881)        | 0.969 (0.967-0.970)        |
| UNI                     | <b>0.829 (0.823-0.834)</b> | <b>0.942 (0.941-0.943)</b> | <b>0.971 (0.970-0.973)</b> |

Supplementary Data Table 49: **Linear probe evaluation for ESCA subtyping based on UKK, WNS, TCGA and CHA (11 classes)**. Pre-extracted patch features of each encoder with logistic regression were evaluated using the UKK, WNS and TCGA cohorts as the train fold and the CHA cohort as the test fold (189,142:178,187), with test performance (n=178,187 ROIs) reported using balanced accuracy, weighted F1 score, and AUROC. Best performing model for each metric is bolded. 95% CI is included in parentheses.

| Encoder                 | 1-NN Balanced ACC          | 1-NN Weighted F1           | 20-NN Balanced ACC         | 20-NN Weighted F1          |
|-------------------------|----------------------------|----------------------------|----------------------------|----------------------------|
| ResNet-50 <sub>IN</sub> | 0.641 (0.635-0.646)        | 0.720 (0.718-0.722)        | 0.631 (0.626-0.636)        | 0.837 (0.836-0.839)        |
| CTransPath4             | 0.821 (0.817-0.826)        | 0.856 (0.855-0.858)        | 0.785 (0.780-0.789)        | 0.918 (0.916-0.919)        |
| REMEDIS                 | 0.793 (0.789-0.798)        | 0.867 (0.865-0.868)        | 0.777 (0.773-0.781)        | 0.918 (0.917-0.919)        |
| UNI                     | <b>0.835 (0.830-0.840)</b> | <b>0.904 (0.903-0.905)</b> | <b>0.836 (0.832-0.840)</b> | <b>0.947 (0.946-0.948)</b> |

Supplementary Data Table 50: **SimpleShot and KNN evaluation for ESCA subtyping based on UKK, WNS, TCGA and CHA (11 classes)**. Pre-extracted patch features of each encoder with SimpleShot (nearest centroid,  $K=1$ ) and Nearest Neighbors ( $K=20$ ) were evaluated using the UKK, WNS and TCGA cohorts as the train fold and the CHA cohort as the test fold (189,142:178,187 ROIs), with test performance (n=189,142 ROIs) reported using balanced accuracy and weighted F1 score. Best performing model for each metric is bolded. 95% CI is included in parentheses.

| Encoder                 | Img Res. | Balanced ACC               | Weighted F1                | AUROC                      |
|-------------------------|----------|----------------------------|----------------------------|----------------------------|
| ResNet-50 <sub>IN</sub> | 224      | 0.349 (0.327-0.370)        | 0.436 (0.412-0.457)        | 0.830 (0.819-0.840)        |
| CTransPath              | 224      | 0.432 (0.410-0.453)        | 0.481 (0.459-0.505)        | <b>0.843 (0.833-0.851)</b> |
| REMEDIS                 | 224      | 0.446 (0.422-0.472)        | 0.473 (0.452-0.494)        | 0.801 (0.786-0.813)        |
| UNI                     | 224      | <b>0.504 (0.483-0.526)</b> | <b>0.533 (0.511-0.554)</b> | 0.825 (0.814-0.835)        |
| ResNet-50 <sub>IN</sub> | 448      | 0.363 (0.343-0.383)        | 0.438 (0.416-0.460)        | 0.832 (0.821-0.841)        |
| CTransPath              | 448      | 0.440 (0.419-0.460)        | 0.497 (0.475-0.519)        | <b>0.840 (0.829-0.849)</b> |
| REMEDIS                 | 448      | 0.458 (0.435-0.481)        | 0.534 (0.513-0.555)        | 0.816 (0.805-0.828)        |
| UNI                     | 448      | <b>0.514 (0.491-0.535)</b> | <b>0.565 (0.543-0.588)</b> | 0.836 (0.824-0.847)        |
| ResNet-50 <sub>IN</sub> | 896      | 0.341 (0.322-0.361)        | 0.438 (0.415-0.461)        | 0.816 (0.806-0.826)        |
| CTransPath              | 896      | 0.436 (0.418-0.456)        | 0.507 (0.486-0.530)        | 0.831 (0.820-0.841)        |
| REMEDIS                 | 896      | 0.502 (0.478-0.525)        | 0.553 (0.532-0.573)        | 0.830 (0.819-0.841)        |
| UNI                     | 896      | <b>0.530 (0.507-0.552)</b> | <b>0.589 (0.568-0.609)</b> | <b>0.853 (0.842-0.863)</b> |
| ResNet-50 <sub>IN</sub> | 1792     | 0.308 (0.288-0.328)        | 0.435 (0.414-0.458)        | 0.780 (0.770-0.790)        |
| CTransPath              | 1792     | 0.396 (0.376-0.414)        | 0.474 (0.453-0.496)        | 0.805 (0.795-0.816)        |
| REMEDIS                 | 1792     | 0.460 (0.436-0.485)        | 0.561 (0.542-0.583)        | 0.819 (0.808-0.830)        |
| UNI                     | 1792     | <b>0.528 (0.507-0.549)</b> | <b>0.572 (0.550-0.591)</b> | <b>0.856 (0.845-0.866)</b> |

Supplementary Data Table 51: **Linear probe evaluation for CRC polyp classification based on UniToPatho (6 classes)**. Pre-extracted patch features of each encoder with logistic regression were evaluated on the official train-test folds (72:28 ratio, 6,270:2,399 ROIs) across multiple image resolutions, with test performance (n=2,399 ROIs) reported using balanced accuracy, weighted F1 score, and AUROC. Best performing model for each metric is bolded. 95% CI is included in parentheses.

| Encoder                 | Img Res. | 1-NN Balanced ACC          | 1-NN Weighted F1           | 20-NN Balanced ACC         | 20-NN Weighted F1          |
|-------------------------|----------|----------------------------|----------------------------|----------------------------|----------------------------|
| ResNet-50 <sub>IN</sub> | 224      | 0.468 (0.440-0.493)        | 0.397 (0.375-0.417)        | 0.331 (0.309-0.353)        | 0.432 (0.408-0.453)        |
| CTransPath              | 224      | <b>0.567 (0.544-0.589)</b> | <b>0.488 (0.467-0.510)</b> | <b>0.446 (0.425-0.468)</b> | <b>0.502 (0.481-0.525)</b> |
| REMEDIS                 | 224      | 0.494 (0.470-0.517)        | 0.420 (0.400-0.441)        | 0.353 (0.330-0.377)        | 0.466 (0.444-0.488)        |
| UNI                     | 224      | 0.533 (0.508-0.554)        | 0.429 (0.408-0.451)        | 0.425 (0.405-0.445)        | 0.476 (0.455-0.497)        |
| ResNet-50 <sub>IN</sub> | 448      | 0.464 (0.437-0.489)        | 0.387 (0.364-0.408)        | 0.351 (0.330-0.373)        | 0.443 (0.421-0.465)        |
| CTransPath              | 448      | 0.592 (0.569-0.614)        | 0.507 (0.486-0.527)        | <b>0.458 (0.436-0.480)</b> | <b>0.514 (0.494-0.535)</b> |
| REMEDIS                 | 448      | 0.517 (0.495-0.540)        | 0.398 (0.378-0.418)        | 0.406 (0.383-0.430)        | 0.464 (0.443-0.487)        |
| UNI                     | 448      | <b>0.602 (0.577-0.627)</b> | <b>0.550 (0.530-0.571)</b> | 0.458 (0.438-0.480)        | 0.503 (0.482-0.523)        |
| ResNet-50 <sub>IN</sub> | 896      | 0.443 (0.420-0.469)        | 0.393 (0.372-0.413)        | 0.361 (0.341-0.384)        | 0.456 (0.436-0.479)        |
| CTransPath              | 896      | 0.565 (0.540-0.587)        | 0.497 (0.477-0.517)        | 0.440 (0.417-0.462)        | 0.502 (0.482-0.524)        |
| REMEDIS                 | 896      | 0.515 (0.490-0.538)        | 0.426 (0.405-0.446)        | 0.369 (0.348-0.389)        | 0.442 (0.420-0.463)        |
| UNI                     | 896      | <b>0.619 (0.597-0.641)</b> | <b>0.543 (0.523-0.565)</b> | <b>0.471 (0.451-0.491)</b> | <b>0.508 (0.486-0.529)</b> |
| ResNet-50 <sub>IN</sub> | 1792     | 0.351 (0.326-0.376)        | 0.323 (0.303-0.343)        | 0.350 (0.328-0.371)        | 0.469 (0.448-0.491)        |
| CTransPath              | 1792     | 0.494 (0.471-0.516)        | 0.474 (0.456-0.494)        | 0.414 (0.394-0.436)        | 0.494 (0.473-0.517)        |
| REMEDIS                 | 1792     | 0.472 (0.446-0.495)        | 0.413 (0.393-0.433)        | 0.352 (0.330-0.376)        | 0.464 (0.443-0.484)        |
| UNI                     | 1792     | <b>0.616 (0.594-0.639)</b> | <b>0.568 (0.549-0.587)</b> | <b>0.476 (0.456-0.498)</b> | <b>0.529 (0.506-0.549)</b> |

Supplementary Data Table 52: **SimpleShot and KNN evaluation for CRC polyp classification based on UniToPatho (6 classes)**. Pre-extracted patch features of each encoder with SimpleShot (nearest centroid,  $K=1$ ) and Nearest Neighbors ( $K=20$ ) were evaluated on the official train-test folds (72:28 ratio, 6,270:2,399 ROIs) across multiple image resolutions, with test performance (n=2,399 ROIs) reported using balanced accuracy and weighted F1 score. Best performing model for each metric is bolded. 95% CI is included in parentheses.

| Encoder                 | Balanced ACC               | Quad. Weighted $\kappa$    | Weighted F1                | AUROC                      |
|-------------------------|----------------------------|----------------------------|----------------------------|----------------------------|
| ResNet-50 <sub>IN</sub> | 0.506 (0.504-0.507)        | 0.592 (0.589-0.594)        | 0.612 (0.610-0.614)        | 0.862 (0.861-0.862)        |
| CTransPath              | 0.630 (0.629-0.632)        | 0.779 (0.777-0.781)        | 0.723 (0.722-0.725)        | 0.915 (0.914-0.915)        |
| REMEDIS                 | 0.630 (0.629-0.632)        | 0.761 (0.759-0.764)        | 0.716 (0.714-0.717)        | 0.906 (0.905-0.906)        |
| UNI                     | <b>0.658 (0.656-0.660)</b> | <b>0.797 (0.796-0.799)</b> | <b>0.743 (0.741-0.744)</b> | <b>0.922 (0.922-0.923)</b> |

Supplementary Data Table 53: **Linear probe evaluation for PRAD tissue classification based on AGGC (5 classes)**. Pre-extracted patch features of each encoder with logistic regression were evaluated on the label stratified train-test folds (69:31 ratio, 780,619:345,021 ROIs) and test performance (n=345,021 ROIs) reported using balanced accuracy, Cohen’s quadratic weighted  $\kappa$ , weighted F1 score, and AUROC. Best performing model for each metric is bolded. 95% CI is included in parentheses.

| Encoder                 | 1-NN Balanced ACC          | 1-NN Weighted F1           | 20-NN Balanced ACC         | 20-NN Weighted F1          |
|-------------------------|----------------------------|----------------------------|----------------------------|----------------------------|
| ResNet-50 <sub>IN</sub> | 0.562 (0.560-0.564)        | 0.482 (0.481-0.484)        | 0.527 (0.526-0.529)        | 0.605 (0.603-0.606)        |
| CTransPath              | 0.691 (0.690-0.693)        | 0.630 (0.628-0.631)        | 0.599 (0.597-0.600)        | 0.666 (0.664-0.668)        |
| REMEDIS                 | 0.655 (0.653-0.657)        | 0.600 (0.598-0.602)        | 0.617 (0.615-0.619)        | 0.674 (0.672-0.675)        |
| UNI                     | <b>0.738 (0.736-0.740)</b> | <b>0.697 (0.696-0.699)</b> | <b>0.655 (0.653-0.656)</b> | <b>0.714 (0.712-0.715)</b> |

Supplementary Data Table 54: **SimpleShot and KNN evaluation for PRAD tissue classification based on AGGC (5 classes)**. Pre-extracted patch features of each encoder with SimpleShot (nearest centroid,  $K=1$ ) and Nearest Neighbors ( $K=20$ ) were evaluated on label stratified train-test folds (69:31 ratio, 780,619:345,021 ROIs) and test performance (n=345,021 ROIs) reported using balanced accuracy and weighted F1 score. Best performing model for each metric is bolded. 95% CI is included in parentheses.

| Encoder                 | SN | Balanced ACC               | Weighted F1                | AUROC                      |
|-------------------------|----|----------------------------|----------------------------|----------------------------|
| ResNet-50 <sub>IN</sub> | ✓  | 0.606 (0.598-0.614)        | 0.686 (0.681-0.691)        | 0.623 (0.615-0.633)        |
| CTransPath              | ✓  | 0.714 (0.707-0.720)        | 0.772 (0.768-0.776)        | 0.782 (0.776-0.789)        |
| REMEDIS                 | ✓  | 0.649 (0.642-0.656)        | 0.792 (0.788-0.797)        | 0.740 (0.733-0.747)        |
| UNI                     | ✓  | <b>0.716 (0.708-0.723)</b> | <b>0.813 (0.809-0.817)</b> | <b>0.797 (0.791-0.804)</b> |

Supplementary Data Table 55: **Linear probe evaluation for CRC MSI prediction based on TCGA (2 classes)**. Pre-extracted patch features of each encoder with logistic regression were evaluated on official train-test folds (38:62 ratio, 19,557:32,361 ROIs), with test performance (n=32,361 ROIs) reported using balanced accuracy, weighted F1 score, and AUROC with stain normalization (SN). Best performing model for each metric is bolded. 95% CI is included in parentheses.

| Encoder                 | SN | 1-NN Balanced ACC          | 1-NN Weighted F1           | 20-NN Balanced ACC         | 20-NN Weighted F1          |
|-------------------------|----|----------------------------|----------------------------|----------------------------|----------------------------|
| ResNet-50 <sub>IN</sub> | ✓  | 0.595 (0.587-0.602)        | 0.663 (0.658-0.668)        | 0.596 (0.590-0.604)        | 0.672 (0.667-0.676)        |
| CTransPath              | ✓  | 0.614 (0.608-0.622)        | 0.669 (0.665-0.674)        | 0.630 (0.624-0.638)        | 0.736 (0.732-0.741)        |
| REMEDIS                 | ✓  | 0.583 (0.576-0.590)        | 0.669 (0.664-0.673)        | 0.603 (0.595-0.610)        | 0.737 (0.733-0.742)        |
| UNI                     | ✓  | <b>0.682 (0.675-0.688)</b> | <b>0.726 (0.722-0.731)</b> | <b>0.694 (0.687-0.700)</b> | <b>0.769 (0.765-0.773)</b> |

Supplementary Data Table 56: **SimpleShot and KNN evaluation for CRC MSI prediction based on TCGA (2 classes)**. Pre-extracted patch features of each encoder with SimpleShot (nearest centroid,  $K=1$ ) and Nearest Neighbors ( $K=20$ ) were evaluated on official train-test folds (38:62 ratio, 19,557:32,361 ROIs), with test performance (n=32,361 ROIs) reported using balanced accuracy and weighted F1 score with stain normalization (SN). Best performing model for each metric is bolded. 95% CI is included in parentheses.

| Encoder                 | SN | Balanced ACC               | Weighted F1                | AUROC                      |
|-------------------------|----|----------------------------|----------------------------|----------------------------|
| ResNet-50 <sub>IN</sub> | ✗  | 0.439 (0.434-0.444)        | 0.525 (0.521-0.529)        | 0.926 (0.924-0.927)        |
| CTransPath              | ✗  | 0.604 (0.599-0.610)        | 0.678 (0.674-0.682)        | 0.967 (0.966-0.968)        |
| REMEDIS                 | ✗  | 0.650 (0.646-0.655)        | 0.709 (0.705-0.713)        | 0.959 (0.958-0.961)        |
| UNI                     | ✗  | <b>0.685 (0.680-0.690)</b> | <b>0.744 (0.741-0.748)</b> | <b>0.978 (0.978-0.979)</b> |
| ResNet-50 <sub>IN</sub> | ✓  | 0.413 (0.408-0.418)        | 0.498 (0.493-0.502)        | 0.916 (0.914-0.918)        |
| CTransPath              | ✓  | 0.561 (0.555-0.566)        | 0.637 (0.633-0.641)        | 0.960 (0.959-0.961)        |
| REMEDIS                 | ✓  | 0.610 (0.605-0.615)        | 0.678 (0.674-0.682)        | 0.958 (0.956-0.959)        |
| UNI                     | ✓  | <b>0.657 (0.652-0.662)</b> | <b>0.718 (0.714-0.721)</b> | <b>0.975 (0.974-0.976)</b> |

Supplementary Data Table 57: **Linear probe evaluation for pan-cancer tissue classification based on TCGA (32 classes)**. Pre-extracted patch features of each encoder with logistic regression were evaluated on label-stratified train-test folds (216,350:55,360 ROIs), with test performance (n=55,360 ROIs) reported using balanced accuracy, weighted F1 score, and AUROC. Best performing model for each metric is bolded. 95% CI is included in parentheses.

| Encoder                 | SN | 1-NN Balanced ACC          | 1-NN Weighted F1           | 20-NN Balanced ACC         | 20-NN Weighted F1          |
|-------------------------|----|----------------------------|----------------------------|----------------------------|----------------------------|
| ResNet-50 <sub>IN</sub> | ✗  | 0.287 (0.282-0.292)        | 0.269 (0.265-0.272)        | 0.347 (0.342-0.351)        | 0.415 (0.410-0.419)        |
| CTransPath              | ✗  | 0.460 (0.454-0.465)        | 0.468 (0.464-0.472)        | 0.495 (0.490-0.499)        | 0.564 (0.560-0.568)        |
| REMEDIS                 | ✗  | 0.553 (0.548-0.558)        | 0.594 (0.590-0.598)        | 0.608 (0.603-0.612)        | 0.669 (0.665-0.673)        |
| UNI                     | ✗  | <b>0.641 (0.636-0.646)</b> | <b>0.675 (0.671-0.679)</b> | <b>0.645 (0.640-0.649)</b> | <b>0.707 (0.703-0.711)</b> |
| ResNet-50 <sub>IN</sub> | ✓  | 0.275 (0.270-0.280)        | 0.254 (0.249-0.257)        | 0.318 (0.314-0.323)        | 0.382 (0.378-0.386)        |
| CTransPath              | ✓  | 0.442 (0.436-0.447)        | 0.438 (0.434-0.442)        | 0.463 (0.459-0.468)        | 0.534 (0.529-0.538)        |
| REMEDIS                 | ✓  | 0.504 (0.499-0.510)        | 0.529 (0.525-0.533)        | 0.541 (0.537-0.546)        | 0.618 (0.614-0.622)        |
| UNI                     | ✓  | <b>0.591 (0.586-0.597)</b> | <b>0.611 (0.607-0.615)</b> | <b>0.595 (0.590-0.600)</b> | <b>0.663 (0.660-0.667)</b> |

Supplementary Data Table 58: **SimpleShot and KNN evaluation for pan-cancer tissue classification based on TCGA (32 classes)**. Pre-extracted patch features of each encoder with SimpleShot (nearest centroid,  $K=1$ ) and Nearest Neighbors ( $K=20$ ) were evaluated on label-stratified train-test folds (216,350:55,360 ROIs), with test performance (n=55,360 ROIs) reported using balanced accuracy and weighted F1 score with and without stain normalization (SN). Best performing model for each metric is bolded. 95% CI is included in parentheses.

| Encoder                 | SN | Balanced ACC               | Weighted F1                | AUROC                      |
|-------------------------|----|----------------------------|----------------------------|----------------------------|
| ResNet-50 <sub>IN</sub> | ✗  | 0.667 (0.662-0.671)        | 0.845 (0.842-0.849)        | 0.919 (0.916-0.922)        |
| CTransPath              | ✗  | 0.760 (0.756-0.765)        | 0.893 (0.891-0.896)        | 0.944 (0.942-0.946)        |
| REMEDIS                 | ✗  | <b>0.891 (0.886-0.894)</b> | 0.937 (0.935-0.939)        | 0.975 (0.973-0.976)        |
| UNI                     | ✗  | 0.887 (0.883-0.891)        | <b>0.944 (0.942-0.946)</b> | <b>0.979 (0.977-0.980)</b> |
| ResNet-50 <sub>IN</sub> | ✓  | 0.651 (0.646-0.655)        | 0.836 (0.833-0.840)        | 0.915 (0.911-0.917)        |
| CTransPath              | ✓  | 0.758 (0.753-0.762)        | 0.891 (0.889-0.894)        | 0.930 (0.928-0.933)        |
| REMEDIS                 | ✓  | <b>0.894 (0.890-0.898)</b> | <b>0.944 (0.942-0.946)</b> | <b>0.978 (0.977-0.979)</b> |
| UNI                     | ✓  | 0.870 (0.865-0.874)        | 0.938 (0.936-0.940)        | 0.975 (0.974-0.977)        |

Supplementary Data Table 59: **Linear probe evaluation for pan-cancer TIL detection based on TCGA (2 classes)**. Pre-extracted patch features of each encoder with logistic regression were evaluated on official train-validation-test folds (69:13:19 ratio, 209,221:38,601:56,275 ROIs, train-validation combined during training) and test performance (n=56,275 ROIs) reported using balanced accuracy, weighted F1 score, and AUROC with and without stain normalization (SN). Best performing model for each metric is bolded. 95% CI is included in parentheses.



| Encoder                 | SN | 1-NN Balanced ACC          | 1-NN Weighted F1           | 20-NN Balanced ACC         | 20-NN Weighted F1          |
|-------------------------|----|----------------------------|----------------------------|----------------------------|----------------------------|
| ResNet-50 <sub>IN</sub> | ✗  | 0.811 (0.806-0.815)        | 0.842 (0.839-0.845)        | 0.821 (0.816-0.826)        | 0.908 (0.905-0.910)        |
| CTransPath              | ✗  | 0.806 (0.802-0.811)        | 0.827 (0.824-0.829)        | 0.840 (0.836-0.845)        | 0.919 (0.916-0.921)        |
| REMEDIS                 | ✗  | 0.804 (0.800-0.808)        | 0.847 (0.844-0.849)        | 0.836 (0.832-0.841)        | 0.905 (0.903-0.908)        |
| UNI                     | ✗  | <b>0.886 (0.883-0.890)</b> | <b>0.931 (0.929-0.933)</b> | <b>0.865 (0.861-0.870)</b> | <b>0.935 (0.933-0.937)</b> |
| ResNet-50 <sub>IN</sub> | ✓  | 0.812 (0.807-0.816)        | 0.848 (0.845-0.850)        | 0.806 (0.801-0.811)        | 0.900 (0.898-0.903)        |
| CTransPath              | ✓  | 0.795 (0.790-0.799)        | 0.813 (0.810-0.816)        | 0.831 (0.827-0.836)        | 0.914 (0.911-0.916)        |
| REMEDIS                 | ✓  | 0.856 (0.852-0.860)        | 0.885 (0.883-0.888)        | <b>0.861 (0.857-0.865)</b> | 0.930 (0.928-0.932)        |
| UNI                     | ✓  | <b>0.865 (0.861-0.868)</b> | <b>0.907 (0.904-0.909)</b> | 0.855 (0.851-0.859)        | <b>0.931 (0.928-0.933)</b> |

Supplementary Data Table 60: **SimpleShot and KNN evaluation for pan-cancer TIL detection based on TCGA (2 classes)**. Pre-extracted patch features of each encoder with SimpleShot (nearest centroid,  $K=1$ ) and Nearest Neighbors ( $K=20$ ) were evaluated on official train-validation-test folds (69:13:19 ratio, 209,221:38,601:56,275 ROIs, train-validation combined during training) with test performance ( $n=56,275$  ROIs) reported using balanced accuracy and weighted F1 score with and without stain normalization (SN). Best performing model for each metric is bolded. 95% CI is included in parentheses.

| Method                      | Encoder                     | AUROC        | FNR          |
|-----------------------------|-----------------------------|--------------|--------------|
| FT (AdamW)                  | ResNet-18                   | 0.970        | 0.252        |
| FT (AdamW)                  | ResNet-18 <sub>IN</sub>     | 0.969        | 0.256        |
| FT (AdamW)                  | ResNet-18 <sub>SimCLR</sub> | 0.967        | 0.275        |
| FT (AdamW)                  | ResNet50                    | 0.969        | 0.241        |
| FT (AdamW)                  | ResNet50 <sub>IN</sub>      | 0.968        | 0.253        |
| FT (AdamW)                  | R26-ViT <sub>IN</sub>       | 0.968        | 0.253        |
| LP (L-BFGS), SN             | UNI                         | 0.975        | 0.231        |
| KNN ( $K=20$ ), SN          | UNI                         | -            | 0.281        |
| SimpleShot ( $K=1$ ), SN    | UNI                         | -            | 0.189        |
| LP (L-BFGS), No SN          | UNI                         | <b>0.979</b> | 0.198        |
| KNN ( $K=20$ ), No SN       | UNI                         | -            | 0.252        |
| SimpleShot ( $K=1$ ), No SN | UNI                         | -            | <b>0.158</b> |

Supplementary Data Table 61: **Comparison with existing baselines for pan-cancer TIL detection based on TCGA (2 classes)**. We compare UNI (results from **Extended Data Table 59,60**, same splits) with existing baselines on this task, which were taken from the ChampKit [\[54\]](#) leaderboard. All of the baselines developed in ChampKit are end-to-end finetuned CNN models which explored the effects of random initialization, transfer learning from ImageNet, or using a self-supervised encoder. FT = finetuned. LP = linear probe. SN = Macenko stain normalization. SimpleShot (nearest centroid,  $K=1$ ) is evaluated using all training data for computing class prototypes.

| Method                                                  | Encoder                              | Cohort             | ACC          |
|---------------------------------------------------------|--------------------------------------|--------------------|--------------|
| FT (SGD, freeze-embed) <a href="#">184</a>              | CLIP ViT-L/14 <a href="#">185</a>    | Val <sub>OD</sub>  | 0.952        |
| ContriMix <a href="#">186</a>                           | DenseNet121 <a href="#">187</a>      | Val <sub>OD</sub>  | 0.919        |
| MBDG <a href="#">188</a>                                | DenseNet121 <a href="#">187</a>      | Val <sub>OD</sub>  | 0.881        |
| ERM w/ targeted aug <a href="#">189</a>                 | DenseNet121 <a href="#">187</a>      | Val <sub>OD</sub>  | 0.927        |
| ERM w/ H&E jitter <a href="#">190</a>                   | ResNeXt101-32x4d <a href="#">191</a> | Val <sub>OD</sub>  | 0.880        |
| KNN ( $K=20$ )                                          | UNI                                  | Val <sub>OD</sub>  | 0.904        |
| SimpleShot (nearest centroid, $K=1$ )                   | UNI                                  | Val <sub>OD</sub>  | 0.968        |
| LP (L-BFGS)                                             | UNI                                  | Val <sub>OD</sub>  | <b>0.974</b> |
| FT (SGD) <a href="#">184</a>                            | CLIP ViT-L/14 <a href="#">185</a>    | Test <sub>OD</sub> | 0.832        |
| FT (AdamW) <a href="#">184</a>                          | CLIP ViT-L/14 <a href="#">185</a>    | Test <sub>OD</sub> | 0.959        |
| FT (SGD, freeze-embed) <a href="#">184</a>              | CLIP ViT-L/14 <a href="#">185</a>    | Test <sub>OD</sub> | 0.965        |
| FT (SGD, freeze-embed, no momentum) <a href="#">184</a> | CLIP ViT-L/14 <a href="#">185</a>    | Test <sub>OD</sub> | 0.967        |
| ContriMix <a href="#">186</a>                           | DenseNet121 <a href="#">187</a>      | Test <sub>OD</sub> | 0.946        |
| MBDG <a href="#">188</a>                                | DenseNet121 <a href="#">187</a>      | Test <sub>OD</sub> | 0.933        |
| ERM w/ targeted aug <a href="#">189</a>                 | DenseNet121 <a href="#">187</a>      | Test <sub>OD</sub> | 0.921        |
| ERM w/ H&E jitter <a href="#">190</a>                   | ResNeXt101-32x4d <a href="#">191</a> | Test <sub>OD</sub> | 0.926        |
| KNN ( $K=20$ )                                          | UNI                                  | Test <sub>OD</sub> | 0.955        |
| SimpleShot (nearest centroid, $K=1$ )                   | UNI                                  | Test <sub>OD</sub> | 0.972        |
| LP (L-BFGS)                                             | UNI                                  | Test <sub>OD</sub> | <b>0.983</b> |

Supplementary Data Table 62: **Comparison with existing baselines for breast metastasis detection in CAMELYON17-WILDS (2 classes)**. We compare UNI (results from **Extended Data Table 41,42**, same splits) with current top-5 solutions from the WILDS [164](#) leaderboard, which evaluate both the out-of-domain validation and test set. All comparisons are end-to-end finetuned CNN or ViT architectures, with additional finetuning protocols specific to their study. In addition, we also show comparisons with end-to-end finetuned ViT-L models that were developed by the 1st place solution [184](#). FT = finetuned. LP = linear probe. OD = out-of-domain. SimpleShot (nearest centroid,  $K = 1$ ) is evaluated using all training data for computing class prototypes.

| Encoder                 | Acc@1                       | Acc@3                       | Acc@5                       | MVAcc@5                     |
|-------------------------|-----------------------------|-----------------------------|-----------------------------|-----------------------------|
| ResNet-50 <sub>IN</sub> | 0.697 (0.685, 0.707)        | 0.789 (0.779, 0.798)        | 0.896 (0.889, 0.903)        | 0.732 (0.721, 0.742)        |
| CTransPath              | 0.819 (0.811, 0.828)        | 0.850 (0.842, 0.858)        | 0.877 (0.870, 0.885)        | 0.831 (0.823, 0.839)        |
| REMEDIS                 | 0.879 (0.871, 0.886)        | 0.942 (0.937, 0.947)        | 0.956 (0.952, 0.961)        | 0.917 (0.911, 0.924)        |
| UNI                     | <b>0.910 (0.903, 0.916)</b> | <b>0.943 (0.938, 0.949)</b> | <b>0.962 (0.957, 0.966)</b> | <b>0.923 (0.917, 0.929)</b> |

Supplementary Data Table 63: **Image retrieval for CRC tissue classification based on CRC-100K (9 classes)**. Pre-extracted patch features of each encoder with retrieval were evaluated on the official train-test folds (100,000:7,180), with test performance (n=7,180 patches) reported using Acc@K for K ∈ {1, 3, 5} and MVAcc@5. Best performing model for each model is bolded. 95% CI is included in parentheses.

| Encoder                 | Acc@1                       | Acc@3                       | Acc@5                       | MVAcc@5                     |
|-------------------------|-----------------------------|-----------------------------|-----------------------------|-----------------------------|
| ResNet-50 <sub>IN</sub> | 0.716 (0.710, 0.721)        | 0.868 (0.864, 0.872)        | 0.912 (0.908, 0.915)        | 0.769 (0.764, 0.774)        |
| CTransPath              | 0.764 (0.759, 0.770)        | 0.877 (0.873, 0.882)        | 0.909 (0.906, 0.913)        | 0.801 (0.796, 0.806)        |
| REMEDIS                 | 0.766 (0.760, 0.771)        | 0.884 (0.880, 0.888)        | 0.916 (0.913, 0.920)        | 0.805 (0.800, 0.810)        |
| UNI                     | <b>0.796 (0.791, 0.801)</b> | <b>0.899 (0.895, 0.902)</b> | <b>0.926 (0.923, 0.930)</b> | <b>0.828 (0.823, 0.833)</b> |

Supplementary Data Table 64: **Image retrieval for CRC tissue classification based on HunCRC (9 classes)**. Pre-extracted patch features of each encoder with retrieval were evaluated on case-stratified train-test folds (76,753:22,655), with test performance (n=22,655 patches) reported using Acc@K for K ∈ {1, 3, 5} and MVAcc@5. Best performing model for each model is bolded. 95% CI is included in parentheses.

| Encoder                 | Acc@1                       | Acc@3                       | Acc@5                       | MVAcc@5                     |
|-------------------------|-----------------------------|-----------------------------|-----------------------------|-----------------------------|
| ResNet-50 <sub>IN</sub> | 0.756 (0.754, 0.758)        | 0.858 (0.856, 0.859)        | 0.887 (0.886, 0.889)        | 0.793 (0.791, 0.795)        |
| CTransPath              | 0.859 (0.857, 0.861)        | 0.926 (0.924, 0.927)        | 0.944 (0.943, 0.945)        | 0.883 (0.882, 0.885)        |
| REMEDIS                 | 0.872 (0.870, 0.873)        | 0.936 (0.935, 0.937)        | 0.953 (0.952, 0.954)        | 0.898 (0.896, 0.899)        |
| UNI                     | <b>0.913 (0.912, 0.914)</b> | <b>0.960 (0.959, 0.960)</b> | <b>0.971 (0.970, 0.972)</b> | <b>0.929 (0.928, 0.931)</b> |

Supplementary Data Table 65: **Image retrieval for ESCA subtyping based on UKK, WNS, TCGA and CHA (11 classes)**. Pre-extracted patch features of each encoder with retrieval were evaluated using the UKK, WNS and TCGA cohorts as the train fold and the CHA cohort as the test fold (189,142:178,187), with test performance (n=178,187 patches) reported using Acc@K for K ∈ {1, 3, 5} and MVAcc@5. Best performing model for each model is bolded. 95% CI is included in parentheses.

| Encoder                 | Acc@1                       | Acc@3                       | Acc@5                       | MVAcc@5                     |
|-------------------------|-----------------------------|-----------------------------|-----------------------------|-----------------------------|
| ResNet-50 <sub>IN</sub> | 0.553 (0.551, 0.555)        | 0.763 (0.762, 0.765)        | 0.833 (0.832, 0.834)        | 0.623 (0.621, 0.624)        |
| CTransPath              | 0.621 (0.620, 0.623)        | 0.793 (0.791, 0.794)        | 0.847 (0.846, 0.848)        | 0.670 (0.668, 0.671)        |
| REMEDIS                 | 0.624 (0.622, 0.625)        | 0.803 (0.802, 0.805)        | 0.858 (0.857, 0.859)        | 0.677 (0.676, 0.679)        |
| UNI                     | <b>0.664 (0.662, 0.665)</b> | <b>0.825 (0.823, 0.826)</b> | <b>0.872 (0.871, 0.873)</b> | <b>0.710 (0.709, 0.712)</b> |

Supplementary Data Table 66: **Image retrieval for PRAD tissue classification based on AGGC (5 classes)**. Pre-extracted patch features of each encoder with retrieval were evaluated on case-stratified train-test folds (780,619:345,021), with test performance (n=345,021 patches) reported using Acc@K for K ∈ {1, 3, 5} and MVAcc@5. Best performing model for each model is bolded. 95% CI is included in parentheses.

| Encoder                 | Acc@1                       | Acc@3                       | Acc@5                       | MVAcc@5                     |
|-------------------------|-----------------------------|-----------------------------|-----------------------------|-----------------------------|
| ResNet-50 <sub>IN</sub> | 0.433 (0.413, 0.454)        | 0.636 (0.616, 0.654)        | 0.712 (0.695, 0.729)        | 0.516 (0.495, 0.536)        |
| CTransPath              | 0.478 (0.457, 0.497)        | 0.625 (0.605, 0.644)        | 0.684 (0.665, 0.702)        | 0.531 (0.510, 0.550)        |
| REMEDIS                 | 0.434 (0.413, 0.453)        | 0.592 (0.572, 0.609)        | 0.659 (0.639, 0.679)        | 0.486 (0.466, 0.504)        |
| UNI                     | <b>0.509 (0.489, 0.529)</b> | <b>0.671 (0.652, 0.690)</b> | <b>0.732 (0.714, 0.750)</b> | <b>0.551 (0.532, 0.570)</b> |

Supplementary Data Table 67: **Image retrieval for CRC polyp classification based on UniToPatho**. Pre-extracted patch features of each encoder with retrieval were evaluated on the official case-stratified train-test folds (6,270:2,399) with resized 1792<sup>2</sup> image resolutions, with test performance (n=345,021 patches) reported using Acc@K for K ∈ {1, 3, 5} and MVAcc@5. Best performing model for each model is bolded. 95% CI is included in parentheses.

| Encoder                 | SN | Acc@1                       | Acc@3                       | Acc@5                       | MVAcc@5                     |
|-------------------------|----|-----------------------------|-----------------------------|-----------------------------|-----------------------------|
| ResNet-50 <sub>IN</sub> | ✗  | 0.379 (0.375, 0.383)        | 0.536 (0.532, 0.540)        | 0.609 (0.606, 0.614)        | 0.455 (0.451, 0.458)        |
| CTransPath              | ✗  | 0.529 (0.525, 0.533)        | 0.659 (0.655, 0.663)        | 0.717 (0.713, 0.720)        | 0.578 (0.574, 0.582)        |
| REMEDIS                 | ✗  | 0.637 (0.633, 0.642)        | 0.741 (0.738, 0.745)        | 0.785 (0.781, 0.788)        | 0.676 (0.672, 0.680)        |
| UNI                     | ✗  | <b>0.671 (0.667, 0.675)</b> | <b>0.778 (0.775, 0.782)</b> | <b>0.821 (0.818, 0.824)</b> | <b>0.711 (0.707, 0.715)</b> |
| ResNet-50 (IN)          | ✓  | 0.349 (0.345, 0.353)        | 0.510 (0.506, 0.514)        | 0.592 (0.587, 0.596)        | 0.434 (0.430, 0.438)        |
| CTransPath              | ✓  | 0.492 (0.488, 0.497)        | 0.638 (0.634, 0.642)        | 0.705 (0.701, 0.709)        | 0.555 (0.551, 0.559)        |
| REMEDIS                 | ✓  | 0.574 (0.570, 0.578)        | 0.704 (0.700, 0.707)        | 0.758 (0.754, 0.761)        | 0.630 (0.626, 0.635)        |
| UNI                     | ✓  | <b>0.620 (0.616, 0.624)</b> | <b>0.749 (0.745, 0.752)</b> | <b>0.801 (0.797, 0.804)</b> | <b>0.671 (0.667, 0.675)</b> |

Supplementary Data Table 68: **Image retrieval for pan-cancer tissue classification based on TCGA (32 classes)**. Pre-extracted patch features of each encoder with retrieval were evaluated on case-stratified train-test folds (216,350:55,360), with test performance (n=55,360 patches) reported using Acc@K for  $K \in \{1, 3, 5\}$  and MVAcc@5 with and without stain normalization (SN). Best performing model for each model is bolded. 95% CI is included in parentheses.

| Encoder                    | Cell type     | Dice                       | Precision                  | Recall                     |
|----------------------------|---------------|----------------------------|----------------------------|----------------------------|
| Komura <i>et al.</i> [102] | Endothelium   | N/A (0.350-0.400)          | N/A                        | N/A                        |
| ResNet-50 <sub>IN</sub>    | Endothelium   | 0.665 (0.658-0.674)        | 0.709 (0.697-0.722)        | 0.658 (0.654-0.663)        |
| CTransPath                 | Endothelium   | 0.658 (0.644-0.663)        | 0.695 (0.682-0.702)        | 0.656 (0.641-0.663)        |
| REMEDIS                    | Endothelium   | 0.684 (0.677-0.694)        | 0.679 (0.672-0.688)        | <b>0.729 (0.724-0.736)</b> |
| UNI                        | Endothelium   | <b>0.696 (0.686-0.703)</b> | <b>0.718 (0.707-0.726)</b> | 0.709 (0.700-0.716)        |
| Komura <i>et al.</i> [102] | Epithelium    | N/A (0.800-0.805)          | N/A                        | N/A                        |
| ResNet-50 <sub>IN</sub>    | Epithelium    | 0.812 (0.808-0.814)        | 0.840 (0.837-0.841)        | 0.816 (0.813-0.819)        |
| CTransPath                 | Epithelium    | 0.815 (0.811-0.817)        | 0.842 (0.839-0.845)        | 0.816 (0.812-0.818)        |
| REMEDIS                    | Epithelium    | 0.824 (0.819-0.829)        | 0.843 (0.840-0.846)        | 0.834 (0.829-0.838)        |
| UNI                        | Epithelium    | <b>0.827 (0.823-0.830)</b> | <b>0.849 (0.847-0.851)</b> | <b>0.834 (0.831-0.838)</b> |
| Komura <i>et al.</i> [102] | Leukocyte     | N/A (0.600-0.650)          | N/A                        | N/A                        |
| ResNet-50 <sub>IN</sub>    | Leukocyte     | 0.691 (0.689-0.693)        | 0.726 (0.724-0.727)        | 0.692 (0.690-0.695)        |
| CTransPath                 | Leukocyte     | 0.686 (0.684-0.688)        | 0.710 (0.707-0.711)        | 0.699 (0.696-0.702)        |
| REMEDIS                    | Leukocyte     | 0.706 (0.704-0.707)        | 0.725 (0.722-0.727)        | <b>0.719 (0.717-0.721)</b> |
| UNI                        | Leukocyte     | <b>0.706 (0.705-0.709)</b> | <b>0.736 (0.734-0.737)</b> | 0.713 (0.712-0.716)        |
| Komura <i>et al.</i> [102] | Lymphocyte    | N/A (0.600-0.650)          | N/A                        | N/A                        |
| ResNet-50 <sub>IN</sub>    | Lymphocyte    | 0.631 (0.625-0.638)        | 0.693 (0.684-0.701)        | 0.626 (0.618-0.634)        |
| CTransPath                 | Lymphocyte    | 0.629 (0.623-0.635)        | 0.677 (0.671-0.682)        | 0.627 (0.620-0.632)        |
| REMEDIS                    | Lymphocyte    | <b>0.653 (0.650-0.660)</b> | <b>0.686 (0.680-0.696)</b> | 0.665 (0.659-0.669)        |
| UNI                        | Lymphocyte    | 0.651 (0.647-0.658)        | 0.686 (0.680-0.693)        | <b>0.665 (0.657-0.673)</b> |
| Komura <i>et al.</i> [102] | Smooth Muscle | N/A (0.600-0.650)          | N/A                        | N/A                        |
| ResNet-50 <sub>IN</sub>    | Smooth Muscle | 0.650 (0.646-0.652)        | 0.699 (0.696-0.703)        | 0.668 (0.664-0.672)        |
| CTransPath                 | Smooth Muscle | 0.655 (0.648-0.659)        | 0.703 (0.698-0.707)        | 0.670 (0.665-0.675)        |
| REMEDIS                    | Smooth Muscle | 0.674 (0.668-0.678)        | 0.724 (0.719-0.728)        | 0.687 (0.684-0.693)        |
| UNI                        | Smooth Muscle | <b>0.690 (0.685-0.694)</b> | <b>0.736 (0.731-0.740)</b> | <b>0.704 (0.700-0.708)</b> |
| Komura <i>et al.</i> [102] | Myeloid Cell  | N/A (0.300-0.350)          | N/A                        | N/A                        |
| ResNet-50 <sub>IN</sub>    | Myeloid Cell  | 0.615 (0.611-0.620)        | 0.698 (0.690-0.703)        | 0.596 (0.592-0.602)        |
| CTransPath                 | Myeloid Cell  | 0.621 (0.618-0.627)        | 0.697 (0.692-0.700)        | 0.604 (0.599-0.610)        |
| REMEDIS                    | Myeloid Cell  | 0.652 (0.647-0.659)        | <b>0.728 (0.719-0.733)</b> | 0.630 (0.625-0.638)        |
| UNI                        | Myeloid Cell  | <b>0.656 (0.655-0.662)</b> | 0.726 (0.724-0.730)        | <b>0.637 (0.634-0.643)</b> |
| Komura <i>et al.</i> [102] | Plasma Cell   | N/A (0.400-0.450)          | N/A                        | N/A                        |
| ResNet-50 <sub>IN</sub>    | Plasma Cell   | 0.703 (0.692-0.706)        | 0.761 (0.745-0.769)        | 0.692 (0.683-0.696)        |
| CTransPath                 | Plasma Cell   | 0.713 (0.703-0.720)        | 0.754 (0.743-0.760)        | 0.709 (0.700-0.716)        |
| REMEDIS                    | Plasma Cell   | <b>0.742 (0.734-0.747)</b> | 0.784 (0.775-0.786)        | <b>0.736 (0.725-0.742)</b> |
| UNI                        | Plasma Cell   | 0.737 (0.730-0.743)        | <b>0.788 (0.778-0.794)</b> | 0.728 (0.722-0.732)        |
| Komura <i>et al.</i> [102] | RBC           | N/A (0.600-0.650)          | N/A                        | N/A                        |
| ResNet-50 <sub>IN</sub>    | RBC           | 0.797 (0.793-0.802)        | 0.827 (0.825-0.831)        | 0.808 (0.800-0.812)        |
| CTransPath                 | RBC           | 0.786 (0.784-0.792)        | 0.818 (0.815-0.821)        | 0.794 (0.789-0.800)        |
| REMEDIS                    | RBC           | 0.795 (0.791-0.800)        | 0.824 (0.821-0.827)        | 0.807 (0.802-0.815)        |
| UNI                        | RBC           | <b>0.803 (0.800-0.808)</b> | <b>0.839 (0.837-0.843)</b> | <b>0.810 (0.804-0.817)</b> |
| ResNet-50 <sub>IN</sub>    | Average       | 0.696                      | 0.744                      | 0.695                      |
| CTransPath                 | Average       | 0.695                      | 0.737                      | 0.700                      |
| REMEDIS                    | Average       | 0.716                      | 0.749                      | <b>0.726</b>               |
| UNI                        | Average       | <b>0.721</b>               | <b>0.760</b>               | 0.725                      |

Supplementary Data Table 69: **Pan-cancer cell type segmentation based on SegPath (8 cell types treated as individual tasks)**. ROI-level cell segmentation of eight major cell types using their official train-test folds in the SegPath dataset [102]. We finetune each pretrained encoder using the Mask2Former framework [103], a flexible framework used commonly for adapting self-supervised models as segmentation backbones for dense prediction tasks. All encoders were trained and evaluated on the official train-validation-test folds, with test performance reported using dice score, precision, and recall. Comparisons to the best model in SegPath [102] is also reported. Best performing model for each metric is bolded. 95% CI is included in parentheses.

| Encoder                 | Cohort | Top K | Balanced ACC               | Weighted F1                |
|-------------------------|--------|-------|----------------------------|----------------------------|
| ResNet-50 <sub>IN</sub> | TCGA   | 5     | 0.531 (0.500-0.566)        | 0.398 (0.280-0.522)        |
| CTransPath              | TCGA   | 5     | 0.796 (0.705-0.869)        | 0.796 (0.712-0.868)        |
| REMEDIS                 | TCGA   | 5     | 0.796 (0.707-0.874)        | 0.795 (0.709-0.877)        |
| UNI                     | TCGA   | 5     | <b>0.908 (0.847-0.960)</b> | <b>0.908 (0.847-0.959)</b> |
| ResNet-50 <sub>IN</sub> | TCGA   | 50    | 0.531 (0.488-0.574)        | 0.412 (0.295-0.526)        |
| CTransPath              | TCGA   | 50    | 0.806 (0.724-0.878)        | 0.806 (0.724-0.878)        |
| REMEDIS                 | TCGA   | 50    | 0.786 (0.701-0.868)        | 0.785 (0.701-0.867)        |
| UNI                     | TCGA   | 50    | <b>0.918 (0.863-0.970)</b> | <b>0.918 (0.867-0.969)</b> |
| ResNet-50 <sub>IN</sub> | CPTAC  | 5     | 0.530 (0.517-0.544)        | 0.444 (0.407-0.481)        |
| CTransPath              | CPTAC  | 5     | 0.845 (0.823-0.865)        | 0.847 (0.825-0.867)        |
| REMEDIS                 | CPTAC  | 5     | 0.771 (0.748-0.793)        | 0.752 (0.723-0.778)        |
| UNI                     | CPTAC  | 5     | <b>0.902 (0.882-0.918)</b> | <b>0.902 (0.883-0.919)</b> |
| ResNet-50 <sub>IN</sub> | CPTAC  | 50    | 0.535 (0.520-0.551)        | 0.461 (0.426-0.497)        |
| CTransPath              | CPTAC  | 50    | 0.827 (0.805-0.848)        | 0.830 (0.808-0.852)        |
| REMEDIS                 | CPTAC  | 50    | 0.806 (0.783-0.825)        | 0.793 (0.767-0.816)        |
| UNI                     | CPTAC  | 50    | <b>0.901 (0.882-0.918)</b> | <b>0.901 (0.883-0.918)</b> |

Supplementary Data Table 70: **Prototypical NSCLC subtyping based on TCGA and CPTAC (2 classes)**. Class prototypes for MI-SimpleShot were developed using annotated ROIs from the TCGA Uniform Tumor Dataset, which we evaluate on the NSCLC subtyping task using the same folds in weakly-supervised ABMIL evaluation (internal evaluation on slides ( $n=98$ ) in TCGA), with external evaluation on slides ( $n=1091$ ) sourced from CPTAC-LUAD ( $n=578$ ) and CPTAC-LUSC ( $n=513$ ). Test performance was reported using balanced accuracy, and weighted F1 score. Best performing model for each metric is bolded. 95% CI is included in parentheses.

| Encoder                 | Cohort | Top K | Balanced ACC               | Weighted F1                |
|-------------------------|--------|-------|----------------------------|----------------------------|
| ResNet-50 <sub>IN</sub> | TCGA   | 5     | 0.636 (0.530-0.725)        | 0.501 (0.394-0.601)        |
| CTransPath              | TCGA   | 5     | 0.896 (0.814-0.950)        | 0.867 (0.803-0.928)        |
| REMEDIS                 | TCGA   | 5     | 0.769 (0.712-0.828)        | 0.728 (0.625-0.826)        |
| UNI                     | TCGA   | 5     | <b>0.928 (0.886-0.964)</b> | <b>0.888 (0.827-0.940)</b> |
| ResNet-50 <sub>IN</sub> | TCGA   | 50    | 0.700 (0.597-0.791)        | 0.607 (0.502-0.707)        |
| CTransPath              | TCGA   | 50    | 0.902 (0.824-0.956)        | 0.878 (0.813-0.930)        |
| REMEDIS                 | TCGA   | 50    | 0.757 (0.696-0.820)        | 0.710 (0.609-0.809)        |
| UNI                     | TCGA   | 50    | <b>0.938 (0.903-0.969)</b> | <b>0.897 (0.837-0.949)</b> |
| ResNet-50 <sub>IN</sub> | CPTAC  | 5     | 0.701 (0.654-0.741)        | 0.439 (0.405-0.473)        |
| CTransPath              | CPTAC  | 5     | 0.919 (0.905-0.930)        | 0.828 (0.804-0.849)        |
| REMEDIS                 | CPTAC  | 5     | <b>0.957 (0.940-0.973)</b> | <b>0.939 (0.924-0.954)</b> |
| UNI                     | CPTAC  | 5     | 0.952 (0.940-0.961)        | 0.896 (0.878-0.914)        |
| ResNet-50 <sub>IN</sub> | CPTAC  | 50    | 0.744 (0.694-0.791)        | 0.575 (0.543-0.606)        |
| CTransPath              | CPTAC  | 50    | 0.891 (0.846-0.925)        | 0.829 (0.807-0.849)        |
| REMEDIS                 | CPTAC  | 50    | <b>0.957 (0.937-0.975)</b> | <b>0.951 (0.937-0.965)</b> |
| UNI                     | CPTAC  | 50    | 0.957 (0.946-0.967)        | 0.909 (0.892-0.925)        |

Supplementary Data Table 71: **Prototypical RCC subtyping based on TCGA and CPTAC-DHMC (3 classes)**. Class prototypes for MI-SimpleShot were developed using annotated ROIs from the TCGA Uniform Tumor Dataset, which we evaluate on the RCC subtyping task using the same folds in weakly-supervised ABMIL evaluation (internal evaluation on slides ( $n=97$ ) in TCGA), with external evaluation on slides ( $n=872$ ) sourced from CPTAC-CCRCC ( $n=404$ ) and DHMC-Kidney ( $n=468$ ) (CCRCC, CHRCC, and PRCC cases only). Test performance was reported using balanced accuracy, and weighted F1 score. Best performing model for each metric is bolded. 95% CI is included in parentheses.

| Pretrain Strategy | Dataset   | CAMELYON17-WILDS           | UniToPatho                 | TCGA-TILs                  | EBRAINS (Fine)             |
|-------------------|-----------|----------------------------|----------------------------|----------------------------|----------------------------|
| Supervised        | TCGA      | 0.909 (0.907-0.911)        | 0.398 (0.375-0.422)        | 0.851 (0.847-0.856)        | 0.569 (0.528-0.612)        |
| DINOv2            | Mass-100K | <b>0.983 (0.982-0.984)</b> | <b>0.528 (0.507-0.549)</b> | <b>0.870 (0.865-0.874)</b> | <b>0.675 (0.633-0.715)</b> |

Supplementary Data Table 72: **Comparison against transfer learning from a general pathology task.** We additionally compare UNI with a ViT-L/16 (with ImageNet-22K transfer) trained end-to-end on the 32-class pan-cancer tissue classification task. This model was evaluated on the same folds as UNI on breast metastasis detection in CAMELYON17-WILDS (official test fold, 302,436:85,054 ROIs), CRC polyp classification in UNITOPATHO (6,270:2,399 ROIs), pan-cancer TIL detection in TCGA (209,221:38,601:56,275 ROIs), and fine-grained brain tumor subtyping in EBRAINS (1151:595:573 slides). We chose these representative tasks due to evaluating unique challenges in out-of-domain generalization, adaption to high resolutions, evaluation on diverse tissue types (ROI and slide-level) respectively. ROI and slide-level tasks were evaluated using linear probing and weakly-supervised ABMIL respectively. Test performance was reported using balanced accuracy. Best performing model for each metric is bolded. 95% CI is included in parentheses.

| Dataset                     | Link                                                                                                                            |
|-----------------------------|---------------------------------------------------------------------------------------------------------------------------------|
| TCGA                        | <a href="https://portal.gdc.cancer.gov">https://portal.gdc.cancer.gov</a>                                                       |
| CPTAC                       | <a href="https://proteomic.datacommons.cancer.gov/pdc">https://proteomic.datacommons.cancer.gov/pdc</a>                         |
| GTEEx                       | <a href="https://www.gtexportal.org/home/">https://www.gtexportal.org/home/</a>                                                 |
| CRC-100K                    | <a href="https://zenodo.org/record/1214456">https://zenodo.org/record/1214456</a>                                               |
| HunCRC (ROIs)               | <a href="https://doi.org/10.6084/m9.figshare.c.5927795.v1">https://doi.org/10.6084/m9.figshare.c.5927795.v1</a>                 |
| HunCRC (Slides)             | <a href="https://doi.org/10.7937/tcia.9cjf-0127">https://doi.org/10.7937/tcia.9cjf-0127</a>                                     |
| BACH                        | <a href="https://iciar2018-challenge.grand-challenge.org/Dataset/">https://iciar2018-challenge.grand-challenge.org/Dataset/</a> |
| TCGA CRC-MSI                | <a href="https://zenodo.org/record/3832231">https://zenodo.org/record/3832231</a>                                               |
| CCRCC Tissue Classification | <a href="https://zenodo.org/record/7898308">https://zenodo.org/record/7898308</a>                                               |
| TCGA-TILs                   | <a href="https://zenodo.org/record/6604094">https://zenodo.org/record/6604094</a>                                               |
| TCGA Uniform Tumor          | <a href="https://zenodo.org/record/5889558">https://zenodo.org/record/5889558</a>                                               |
| UniToPatho                  | <a href="https://zenodo.org/record/4643645/">https://zenodo.org/record/4643645/</a>                                             |
| ESCA                        | <a href="https://zenodo.org/record/7548828">https://zenodo.org/record/7548828</a>                                               |
| CAMELYON17-WILDS            | <a href="https://wilds.stanford.edu/datasets/">https://wilds.stanford.edu/datasets/</a>                                         |
| EBRAINS                     | <a href="https://doi.org/10.25493/WQ48-ZGX">https://doi.org/10.25493/WQ48-ZGX</a>                                               |
| DHMC                        | <a href="https://bmirids.github.io/KidneyCancer/">https://bmirids.github.io/KidneyCancer/</a>                                   |
| BRACS                       | <a href="https://www.bracs.icar.cnr.it/">https://www.bracs.icar.cnr.it/</a>                                                     |
| PANDA                       | <a href="https://panda.grand-challenge.org/data/">https://panda.grand-challenge.org/data/</a>                                   |
| SegPath                     | <a href="https://zenodo.org/record/7412731">https://zenodo.org/record/7412731</a>                                               |
| AGGC                        | <a href="https://zenodo.org/record/6460100">https://zenodo.org/record/6460100</a>                                               |

Supplementary Data Table 73: **Summary of publicly available datasets.**
